# Supplementary figures and images for: Cyclization–carbonylation–cyclization coupling reaction of α,β-alkynic hydrazones with palladium(ii)-bisoxazoline catalyst
Source: Royal Society of Chemistry journal article supplement (doi:10.1039/c3ob40913a), 2013-01-01

2a

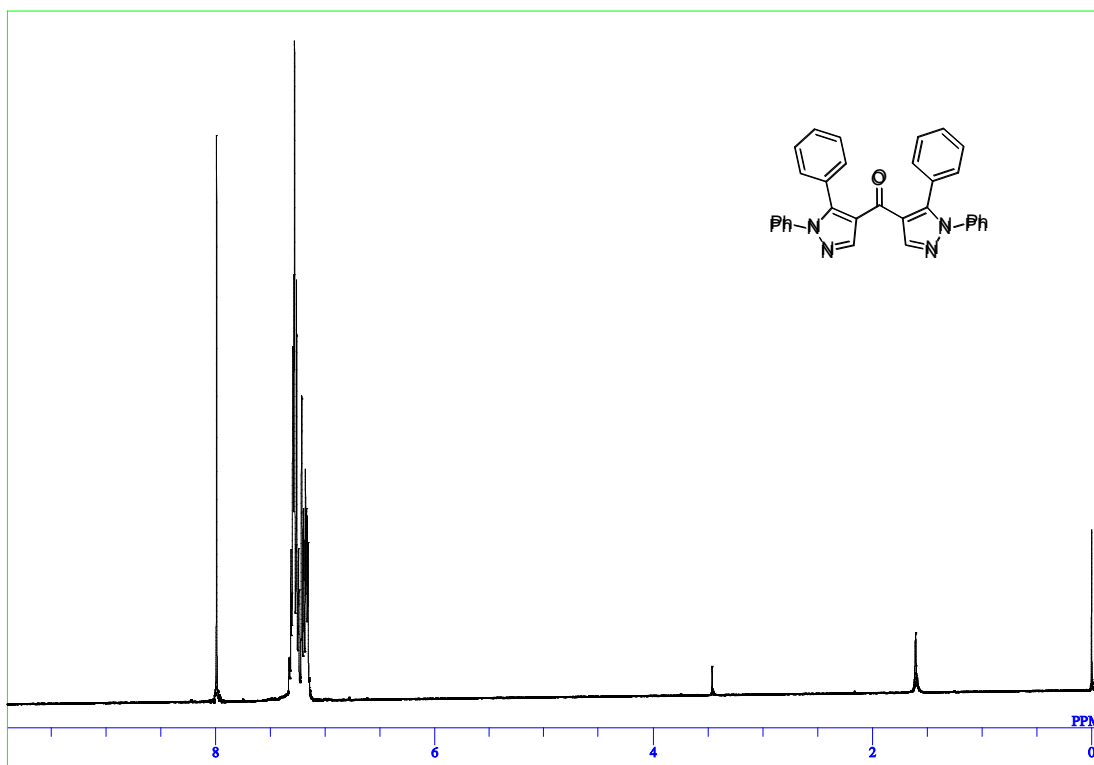

2a

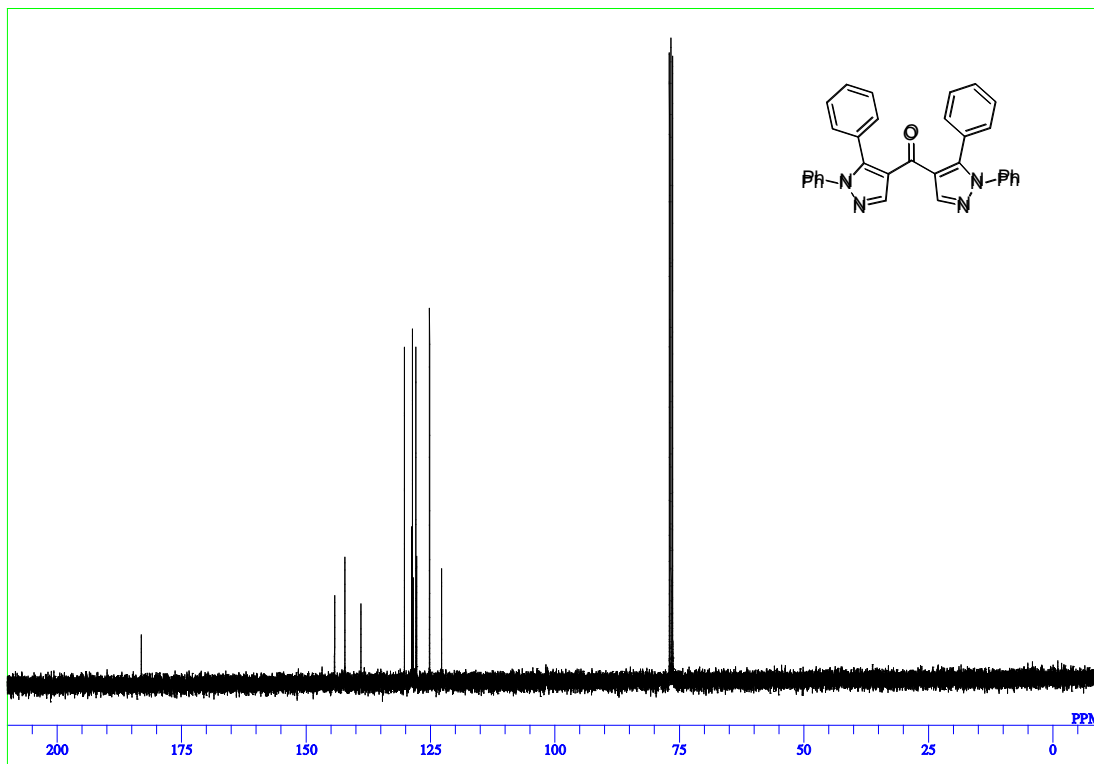

3a

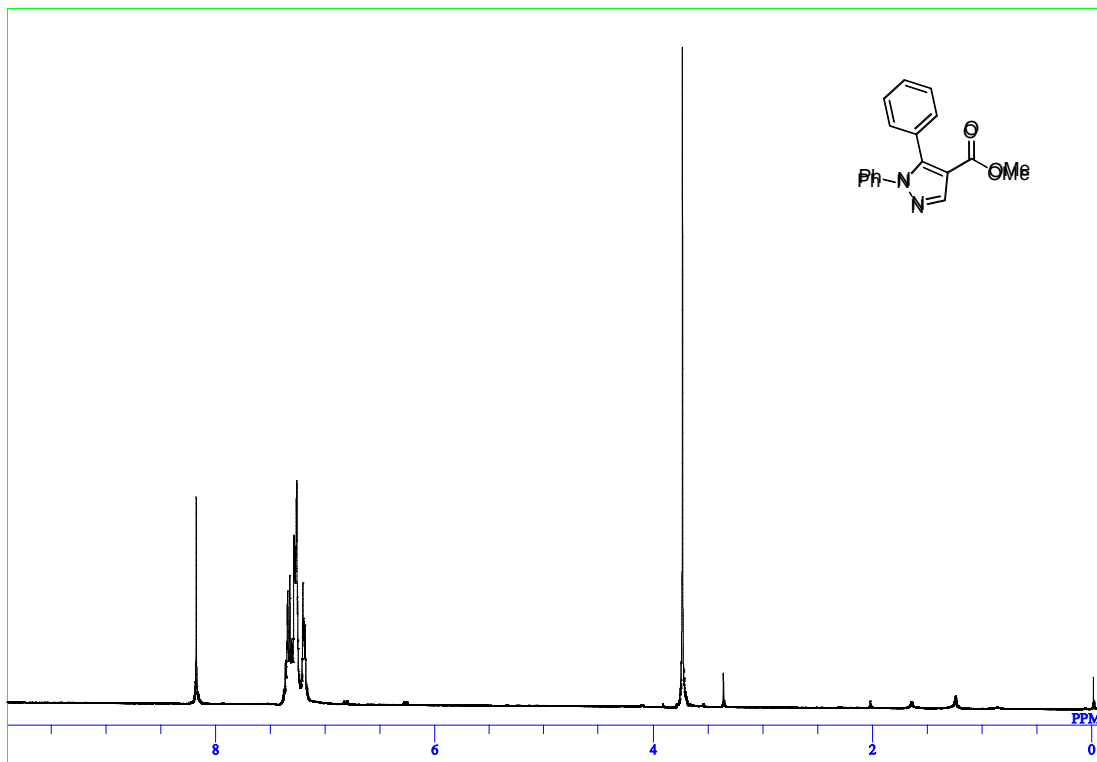

3a

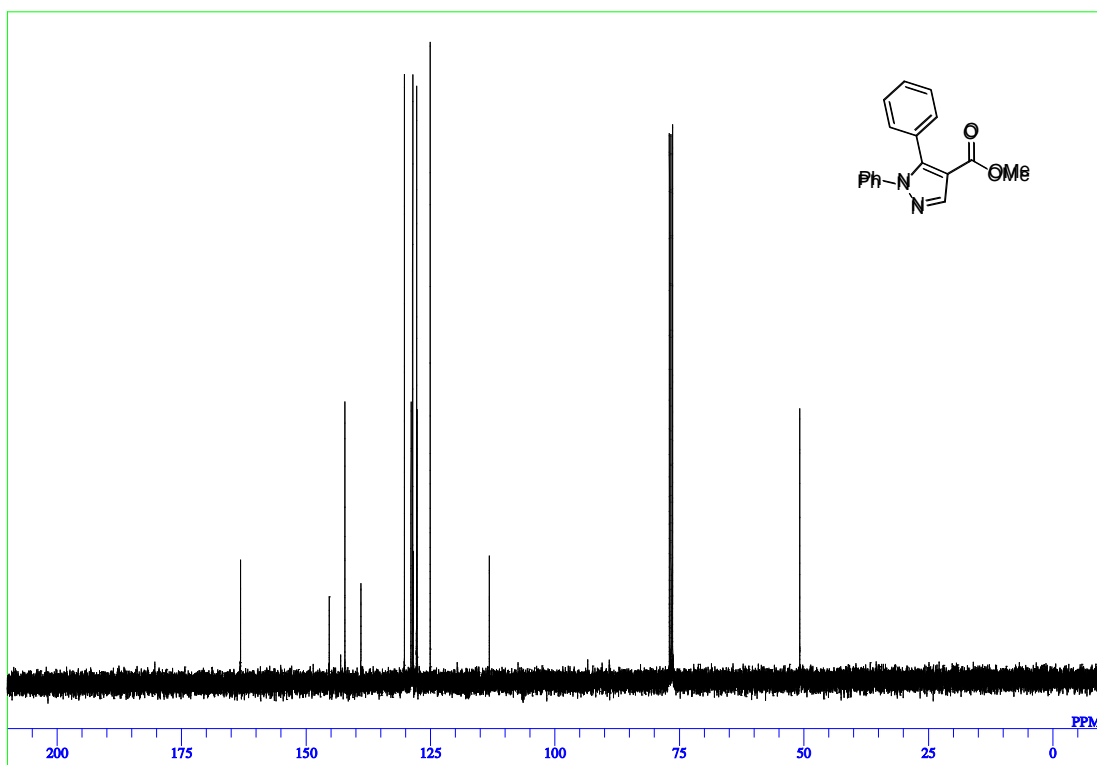



2b

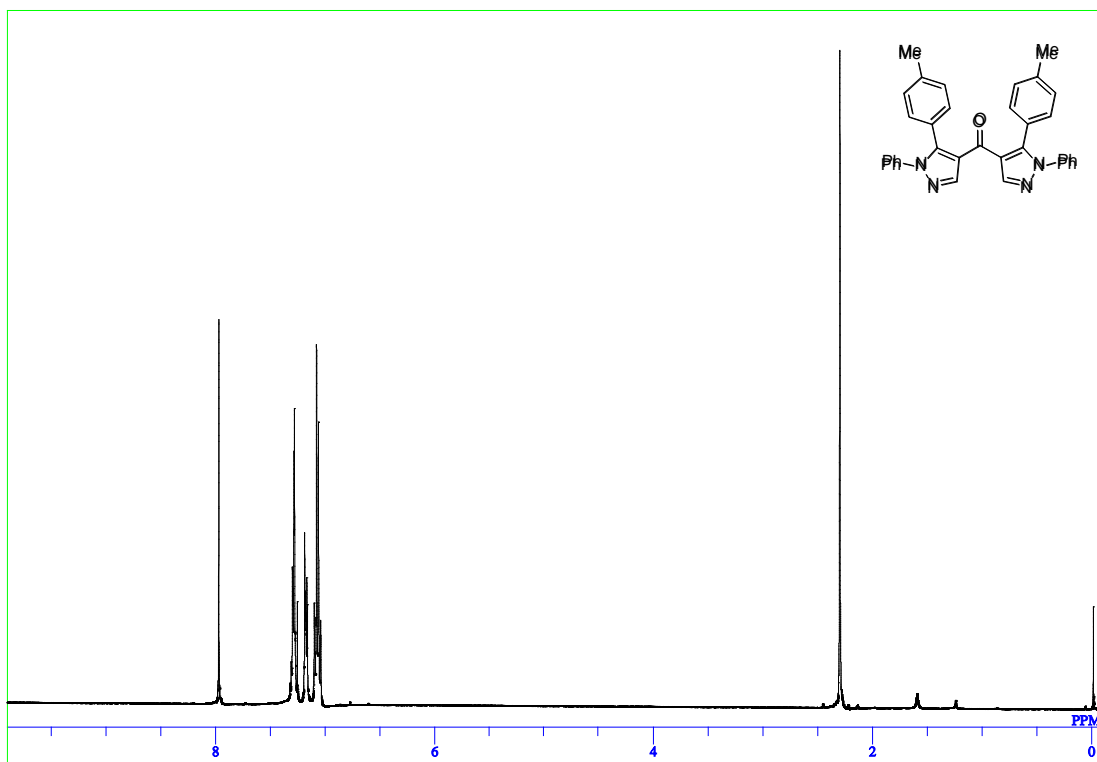

2b

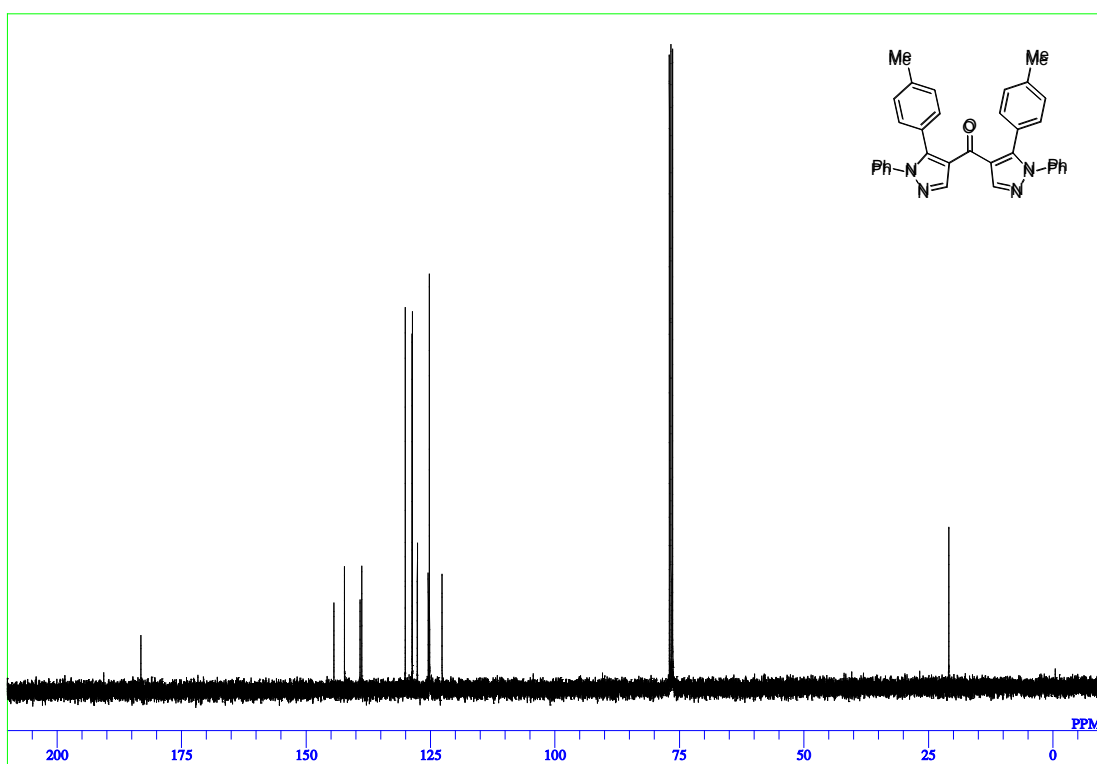

2c

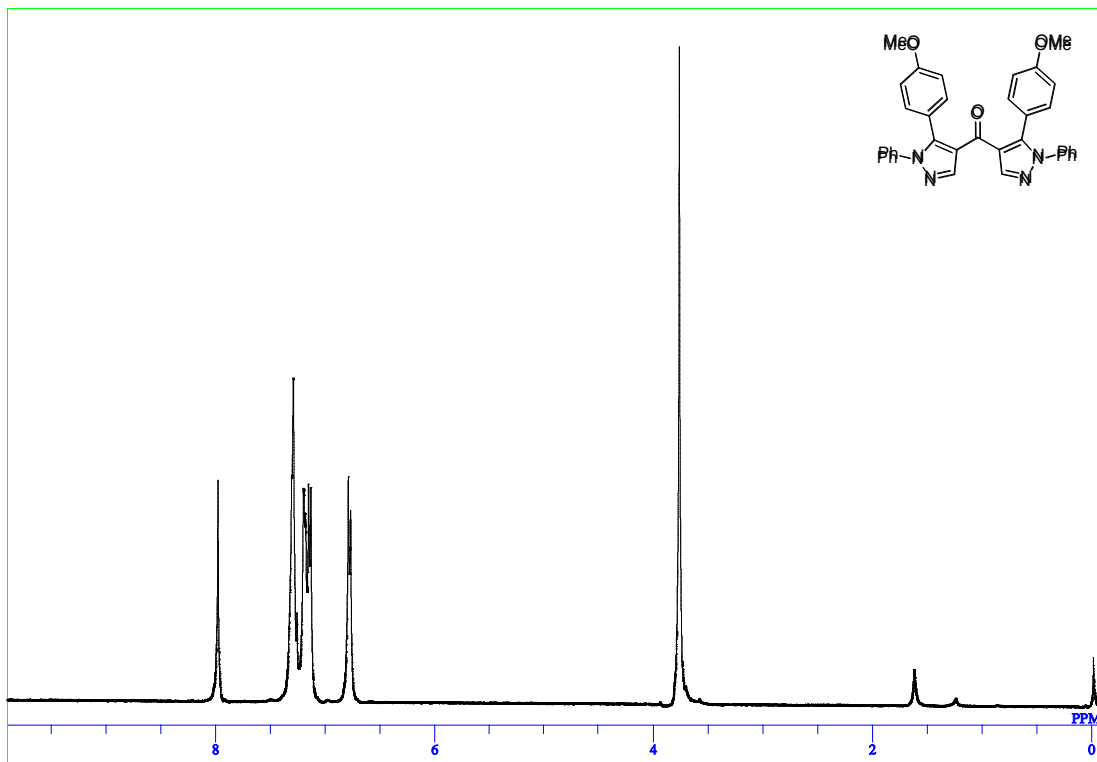

2c

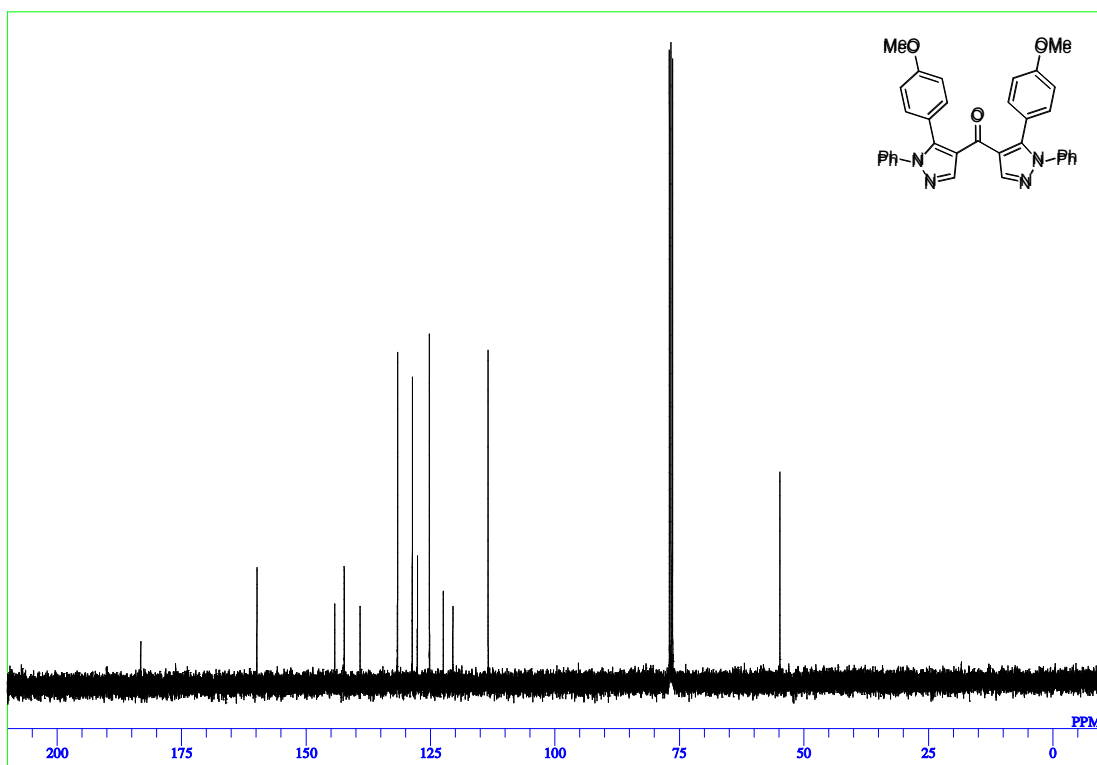

2d

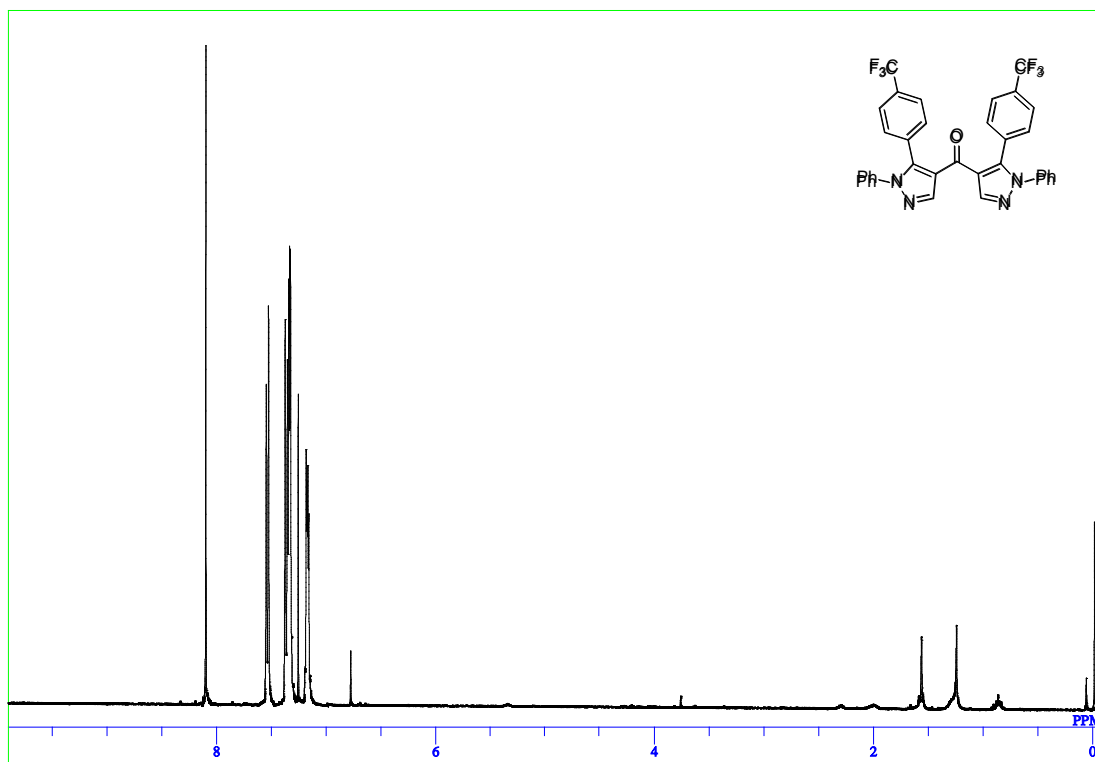

2d

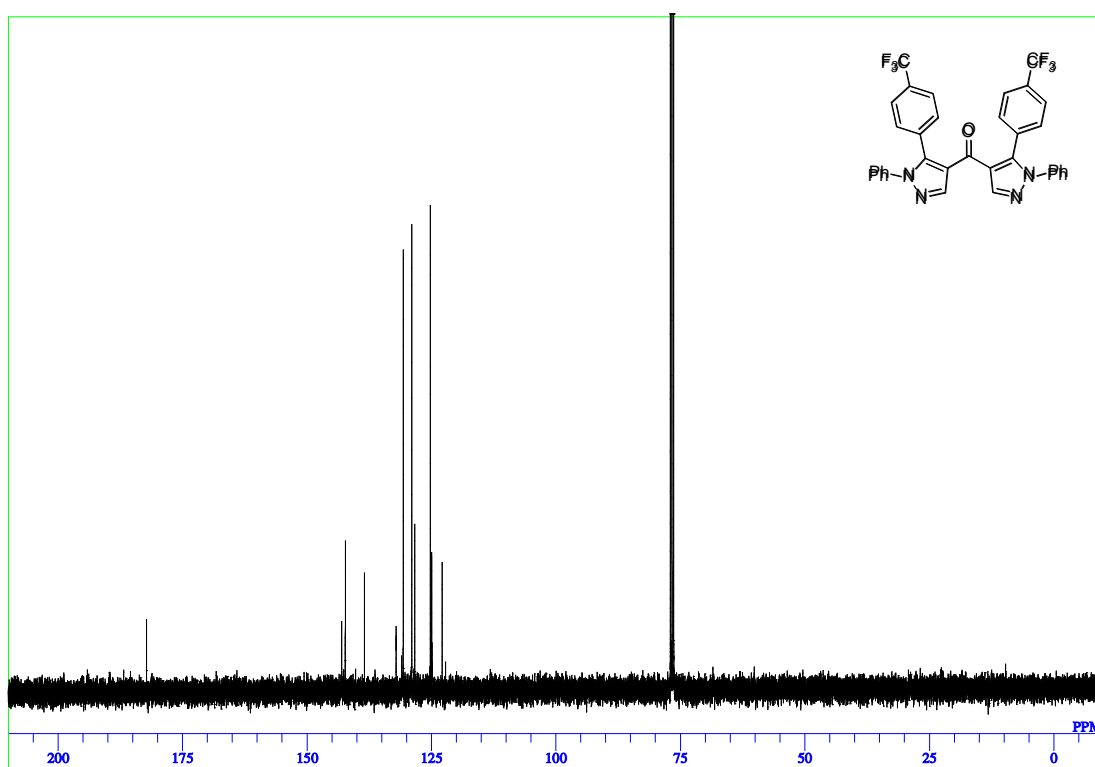

2e

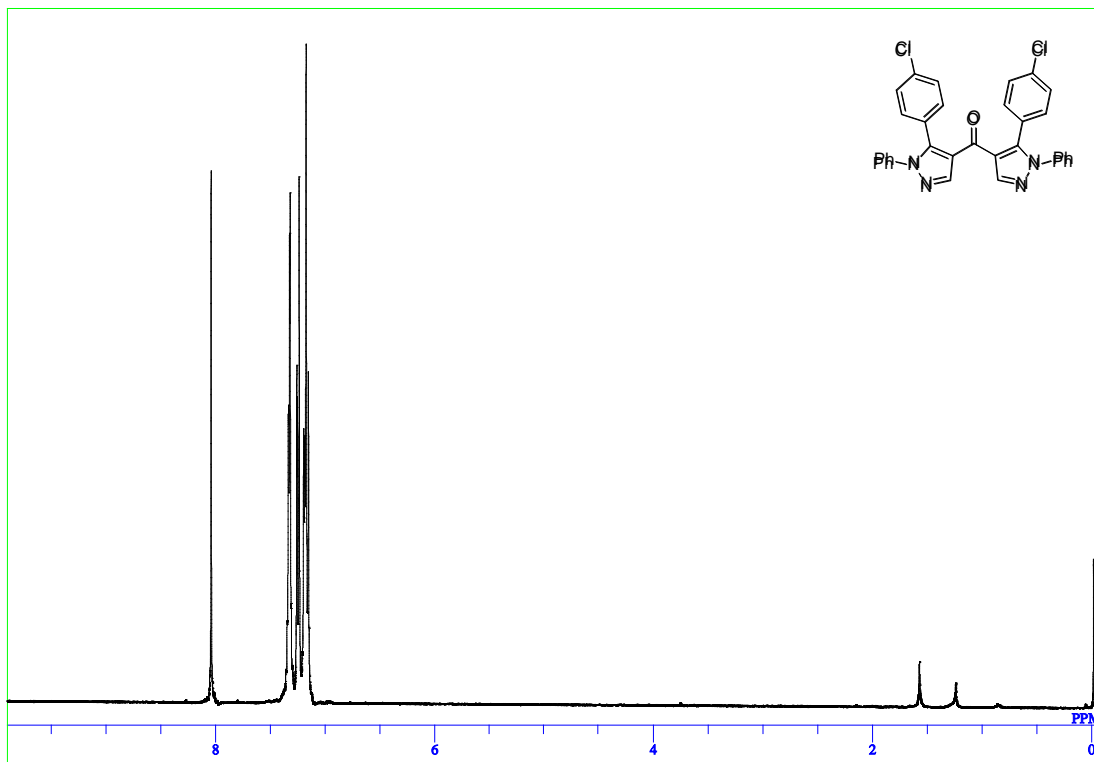

2e

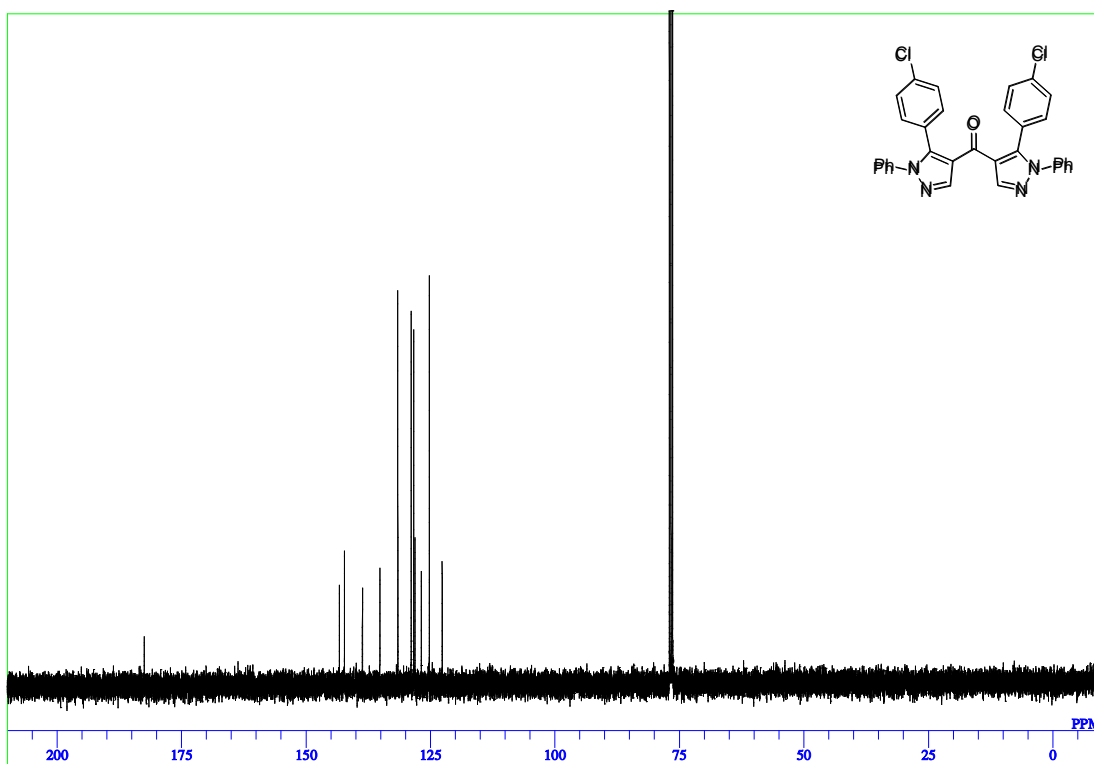

2f

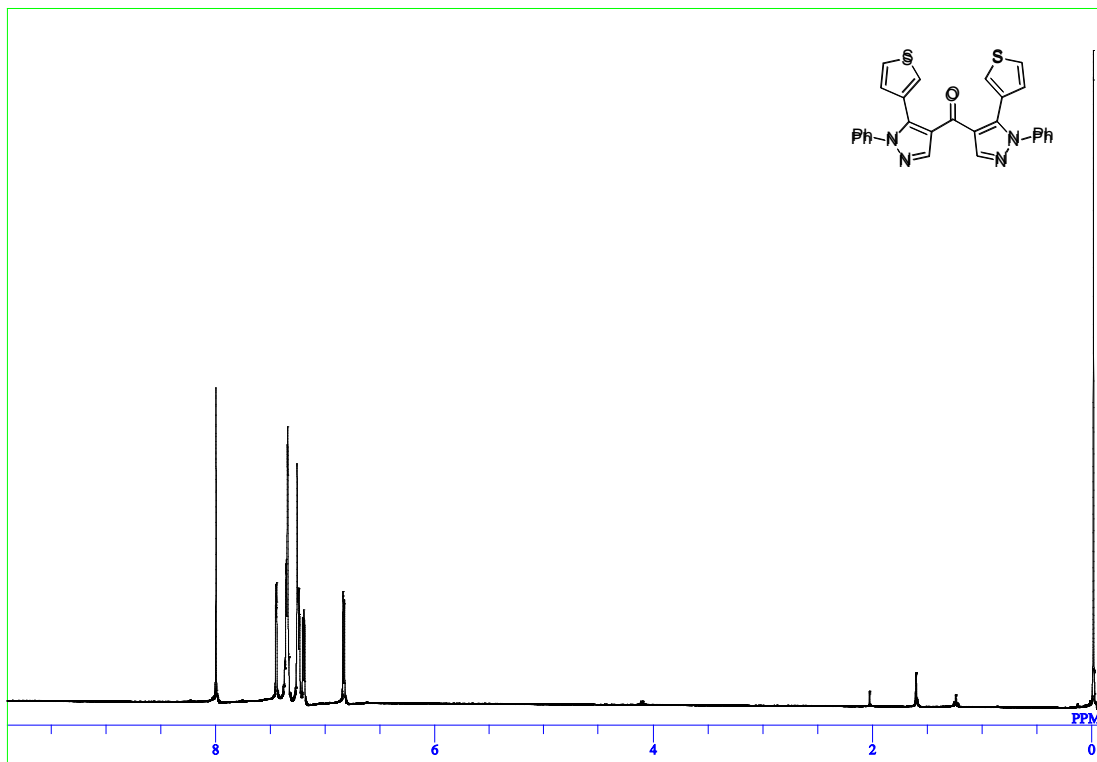

2f

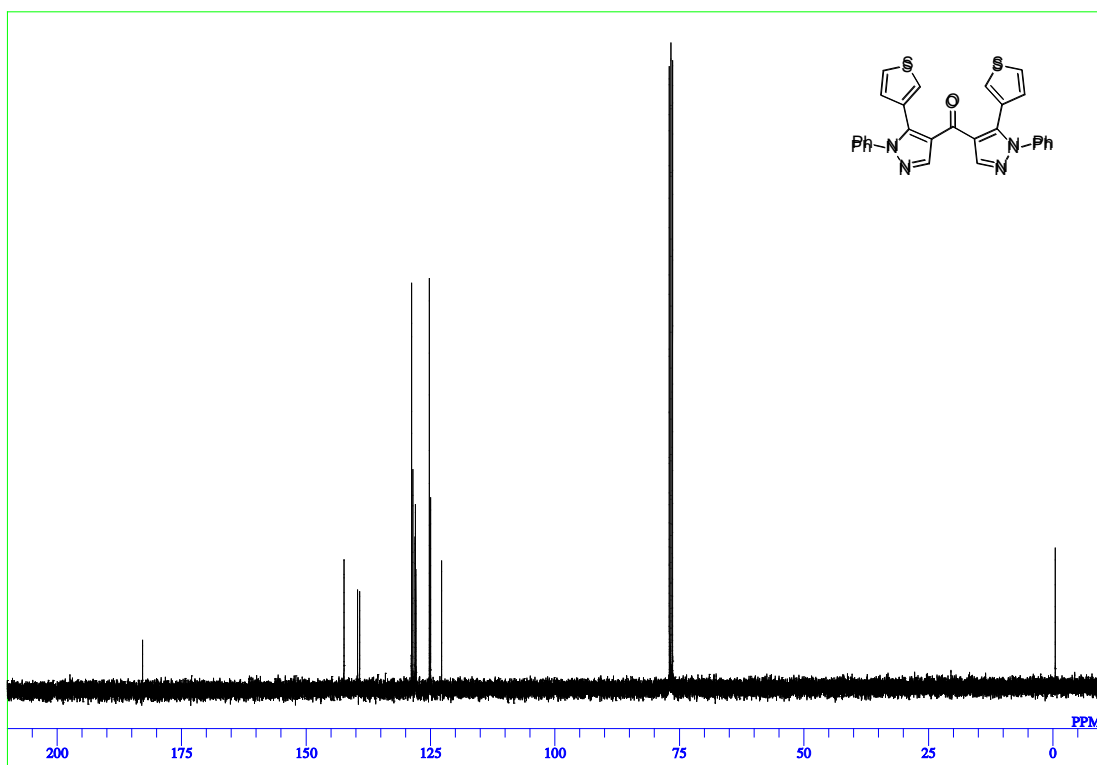

2g

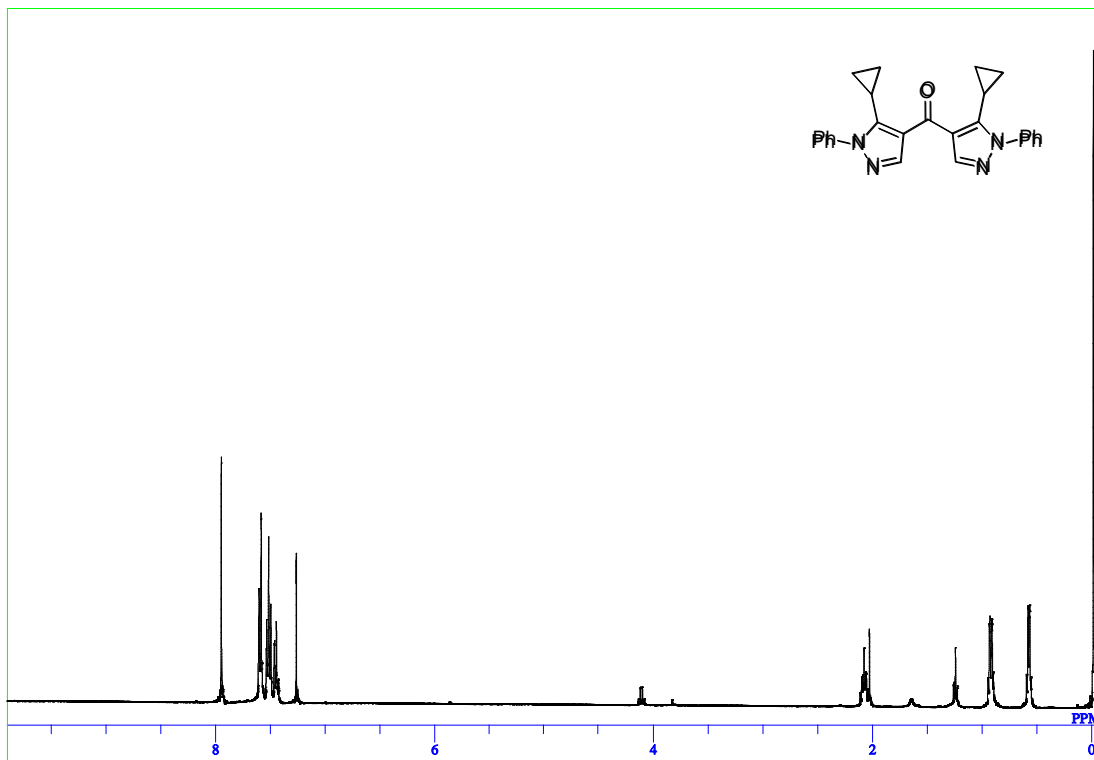

2g

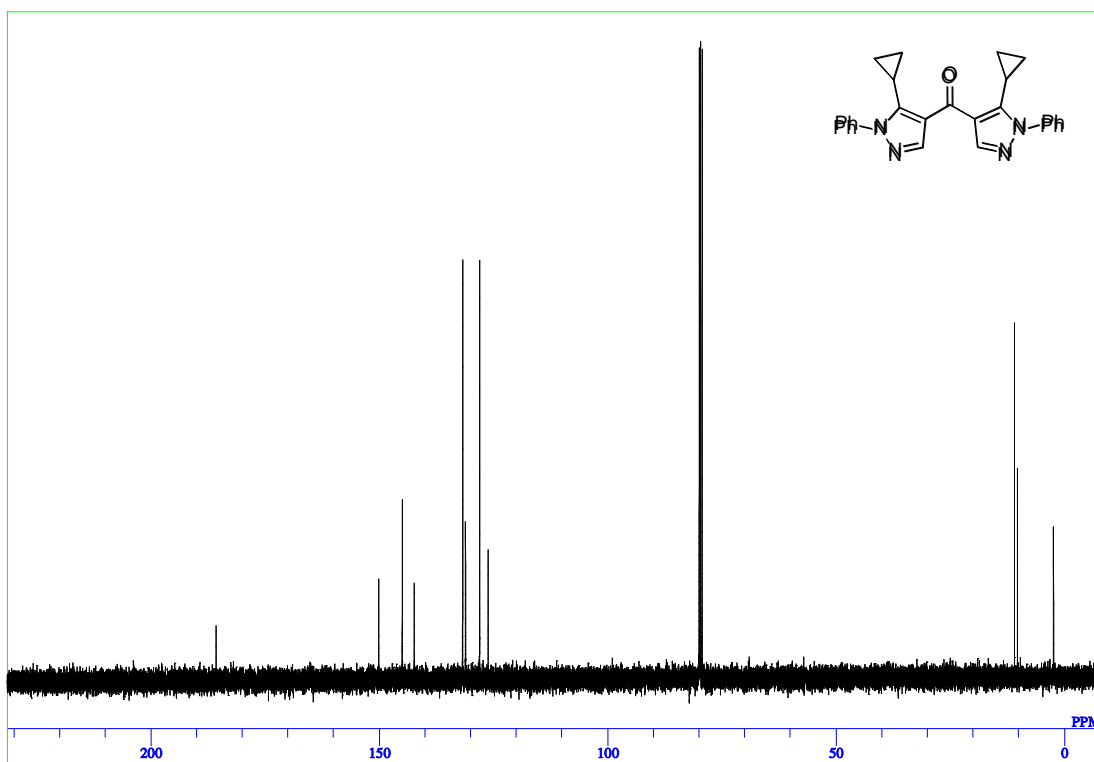

2h

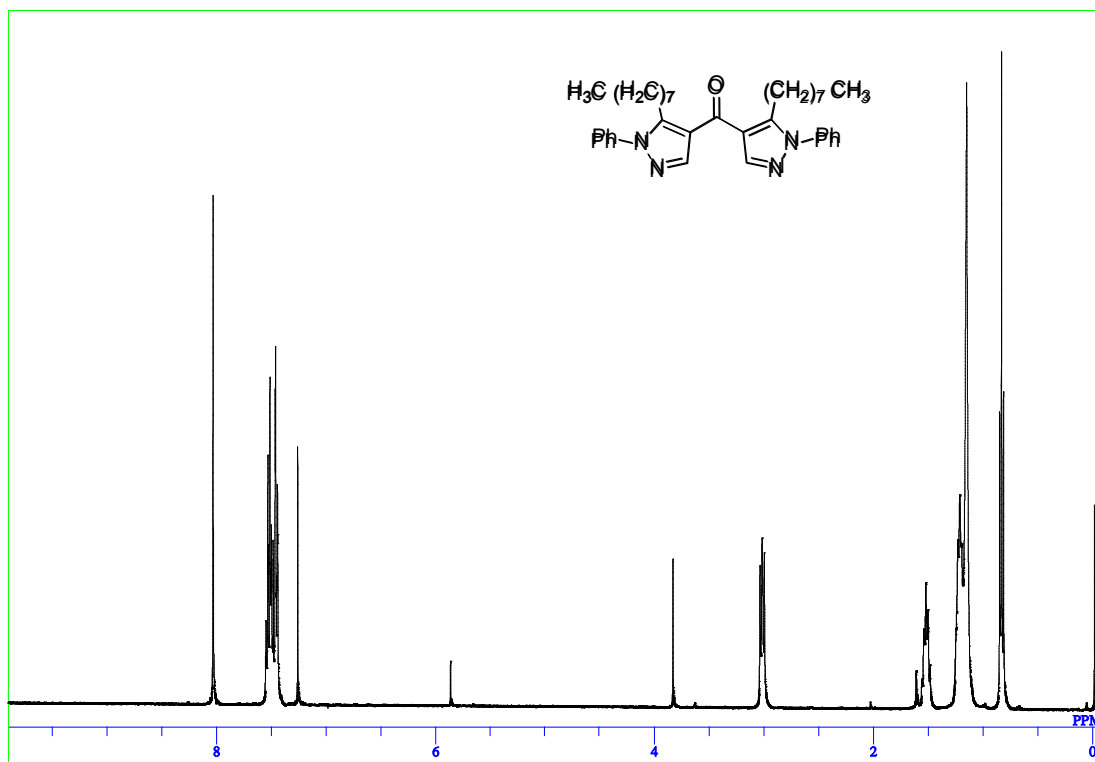

2h

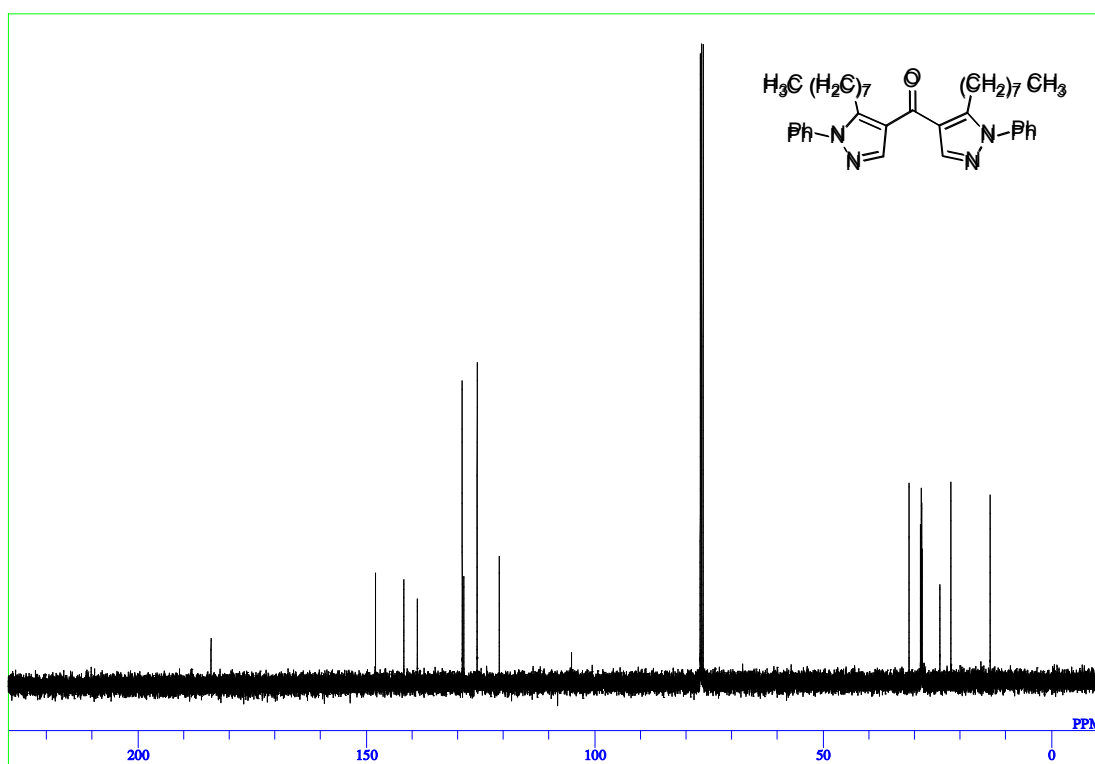

2i

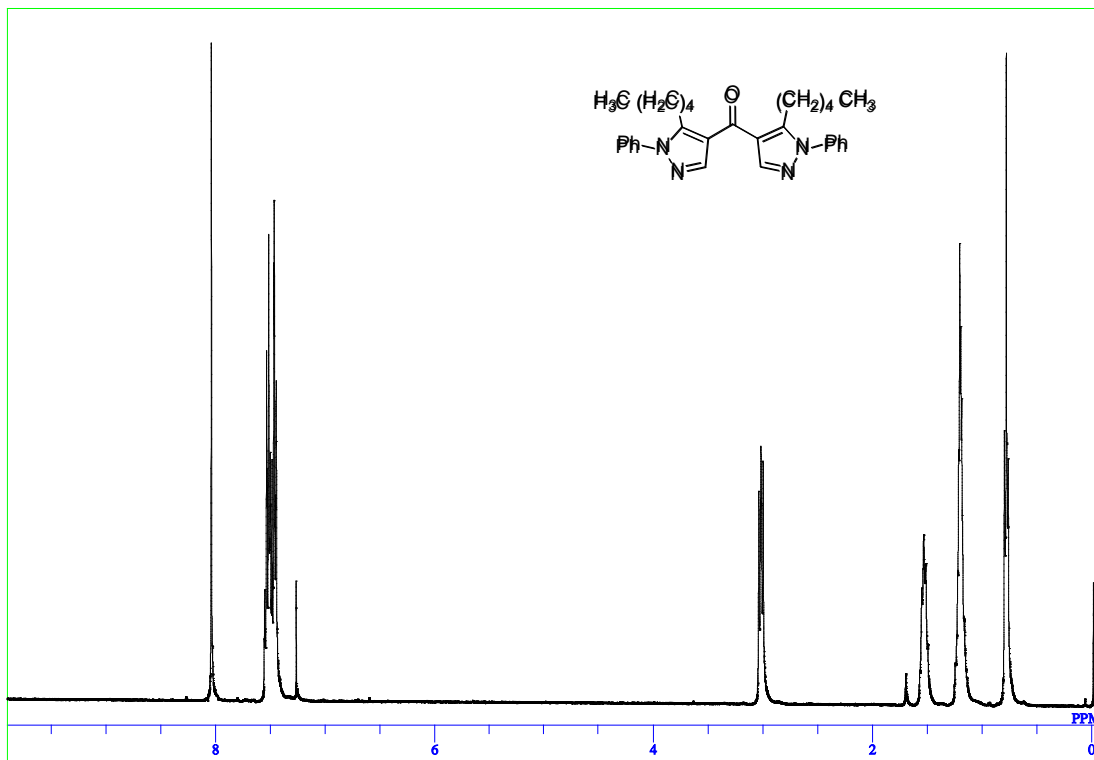

2i

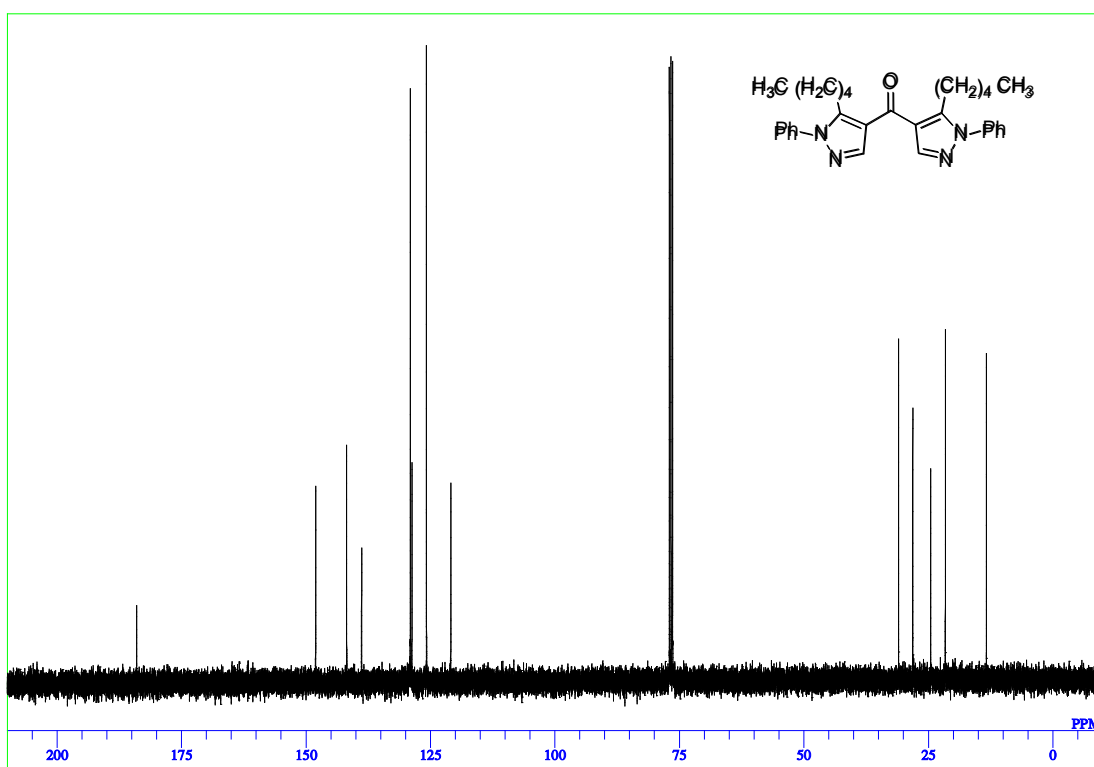



2j

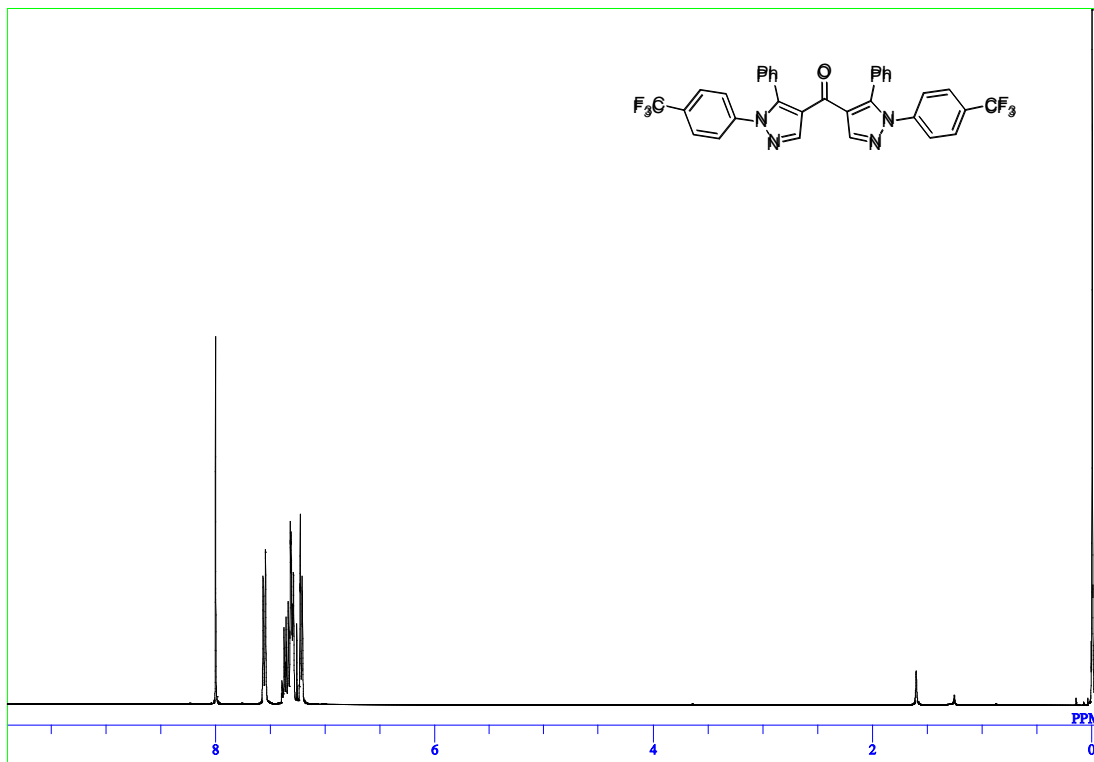

2j

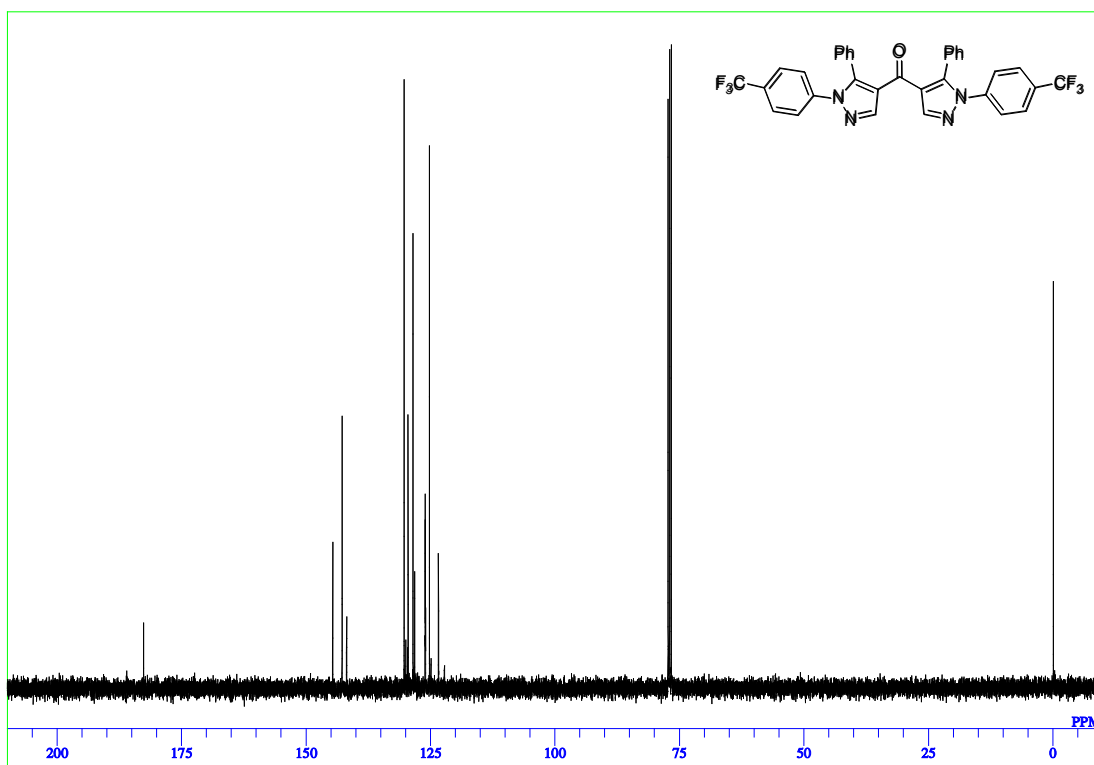

2k

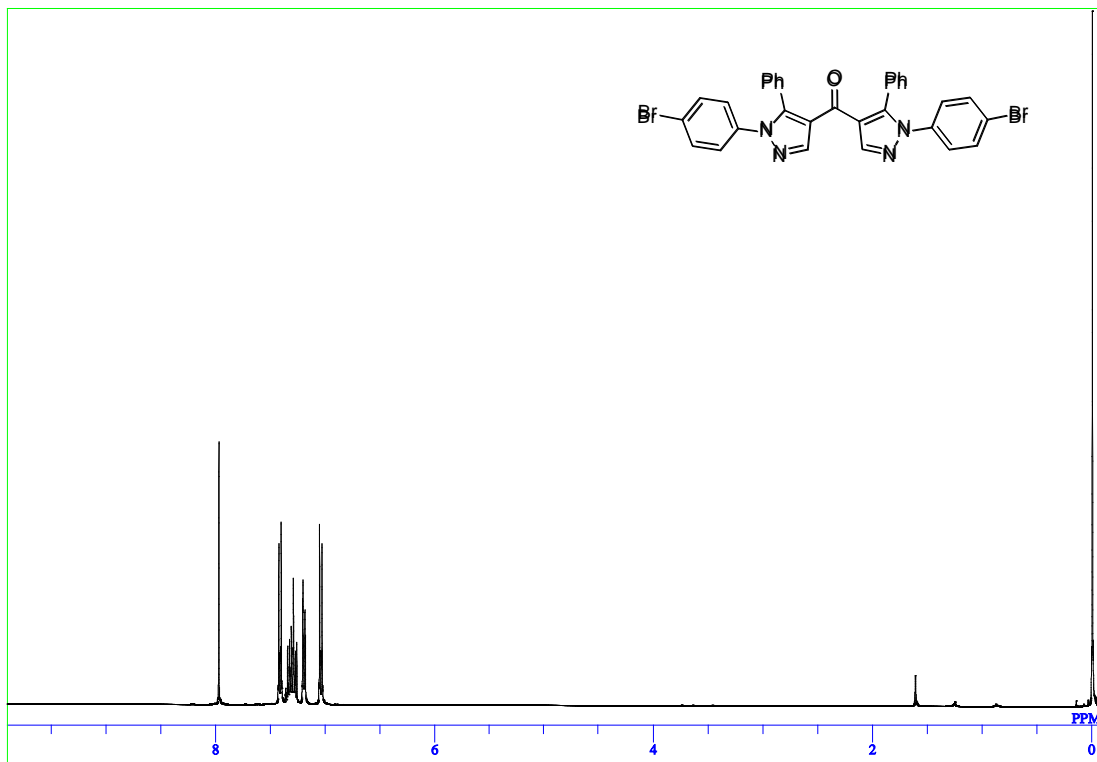

2k

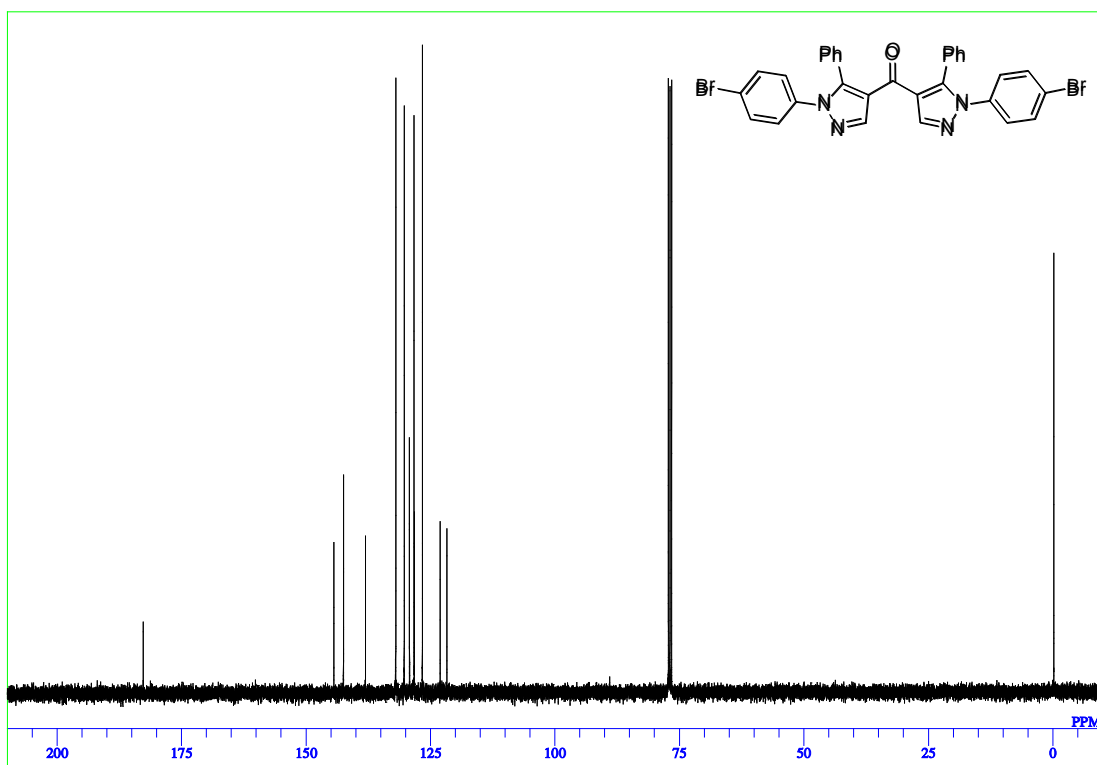

21

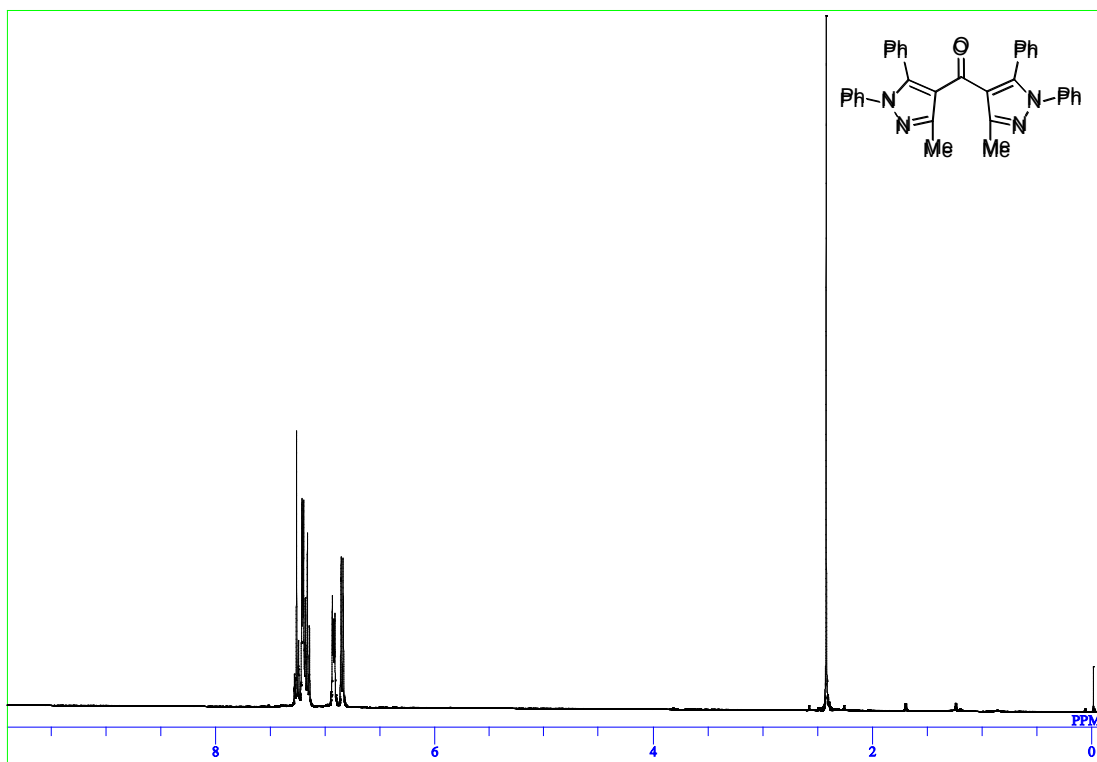

21

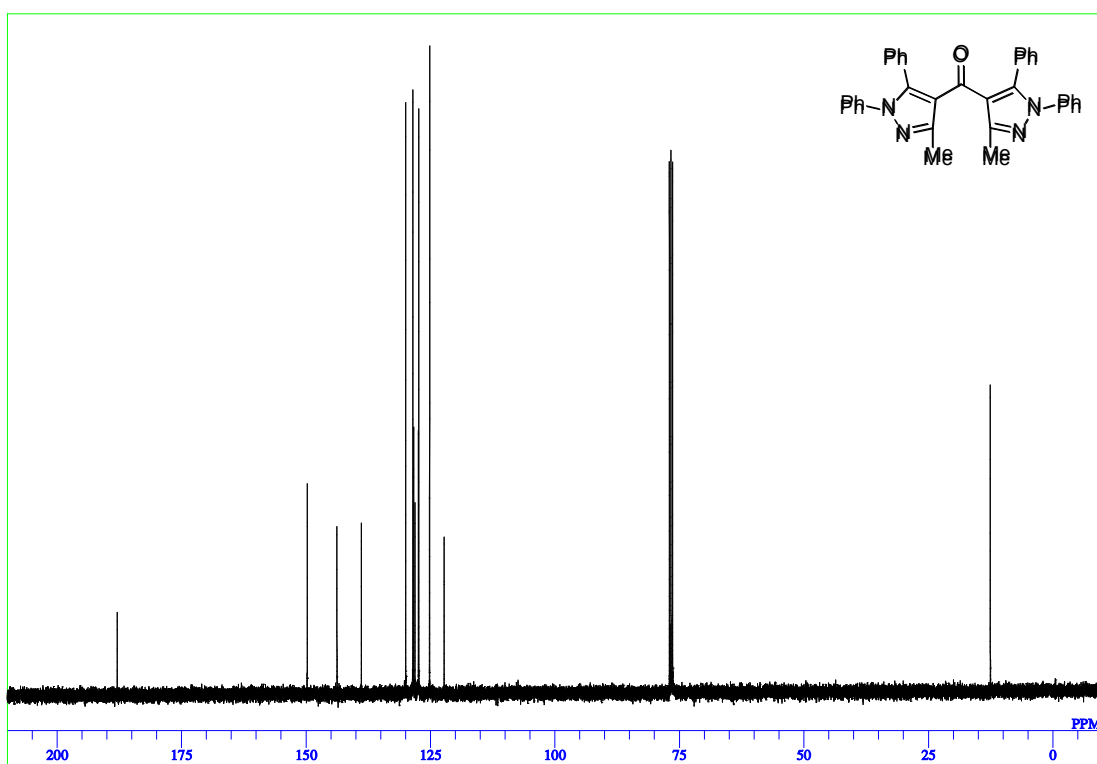

2m

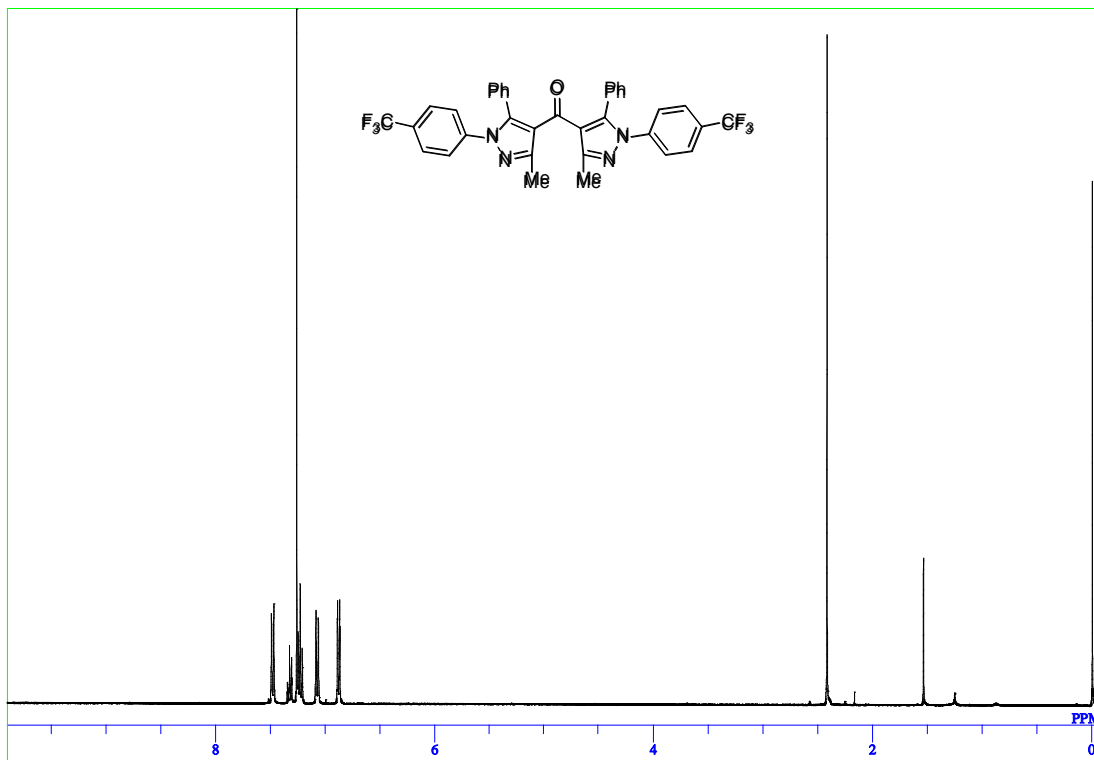

2m

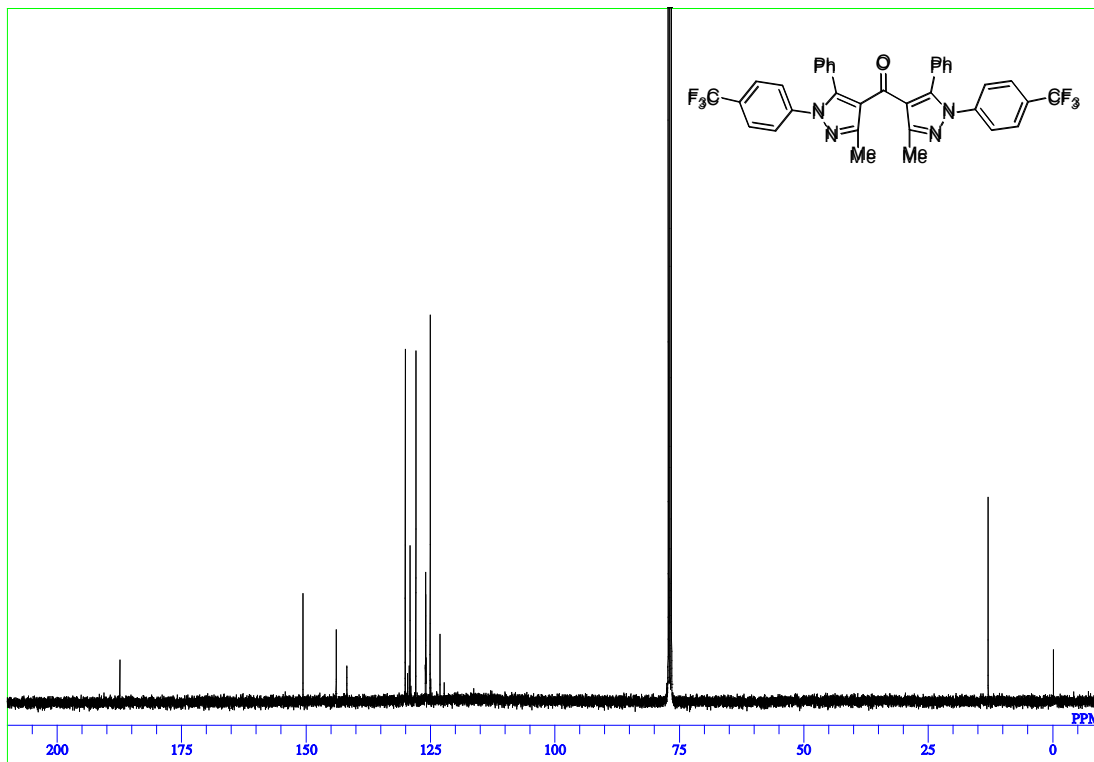

2n

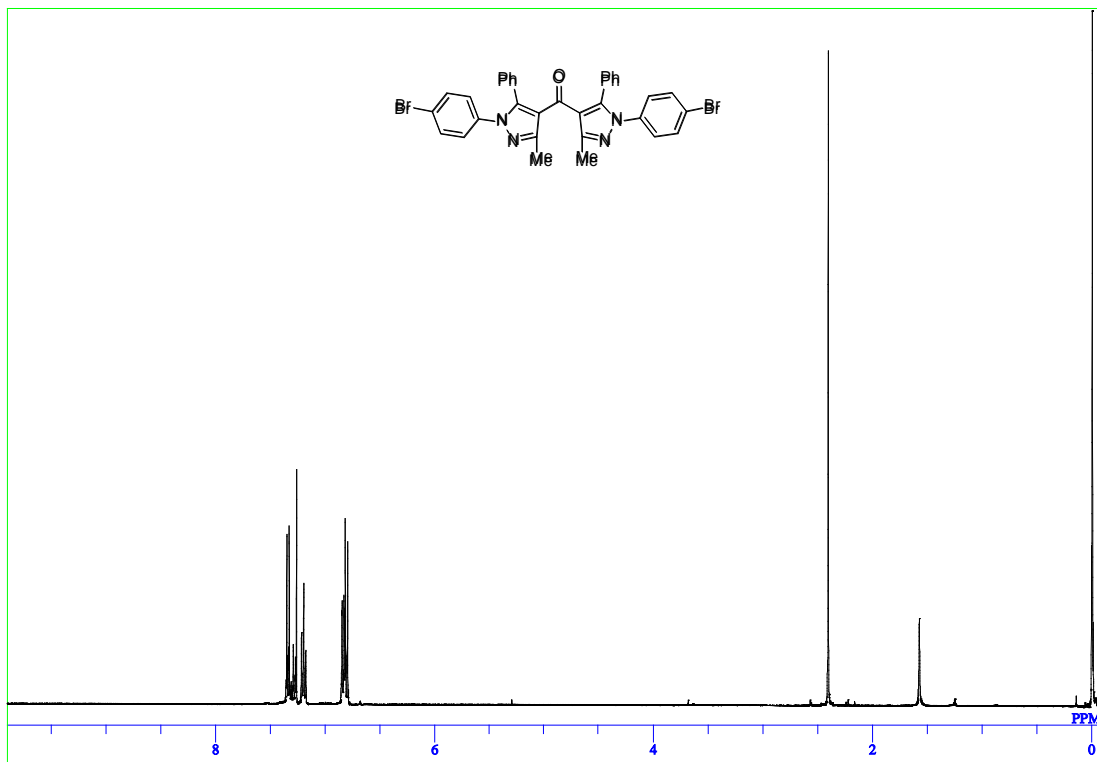

2n

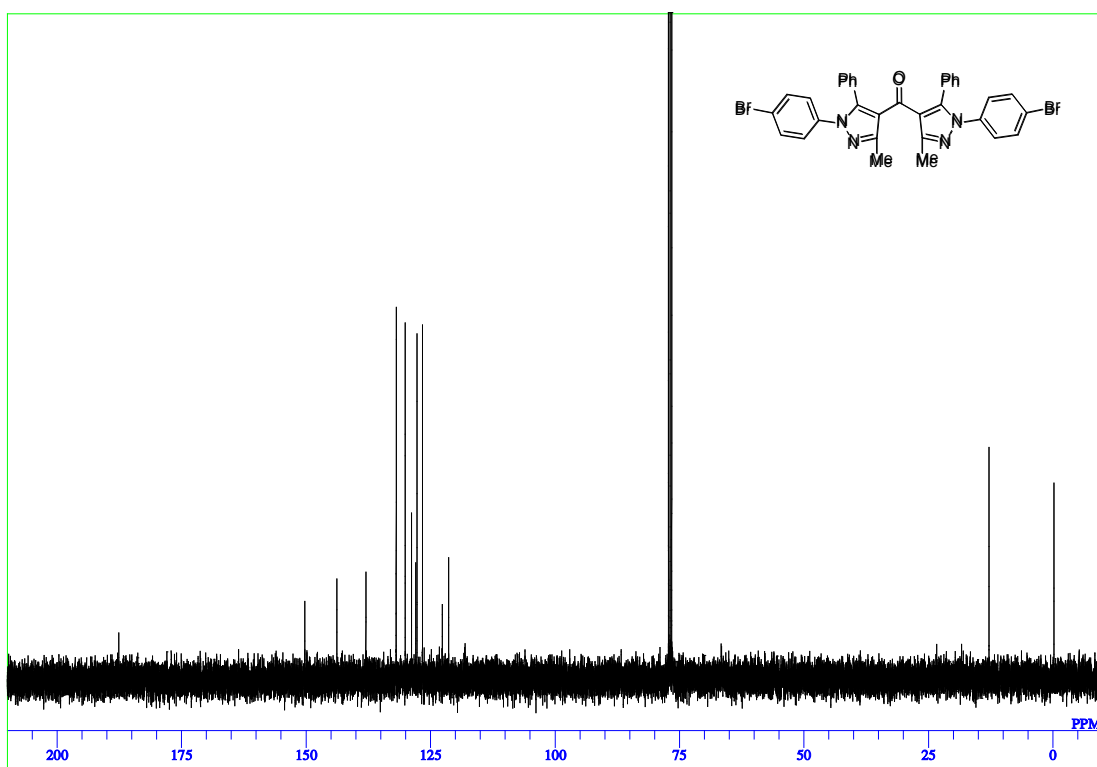

2o

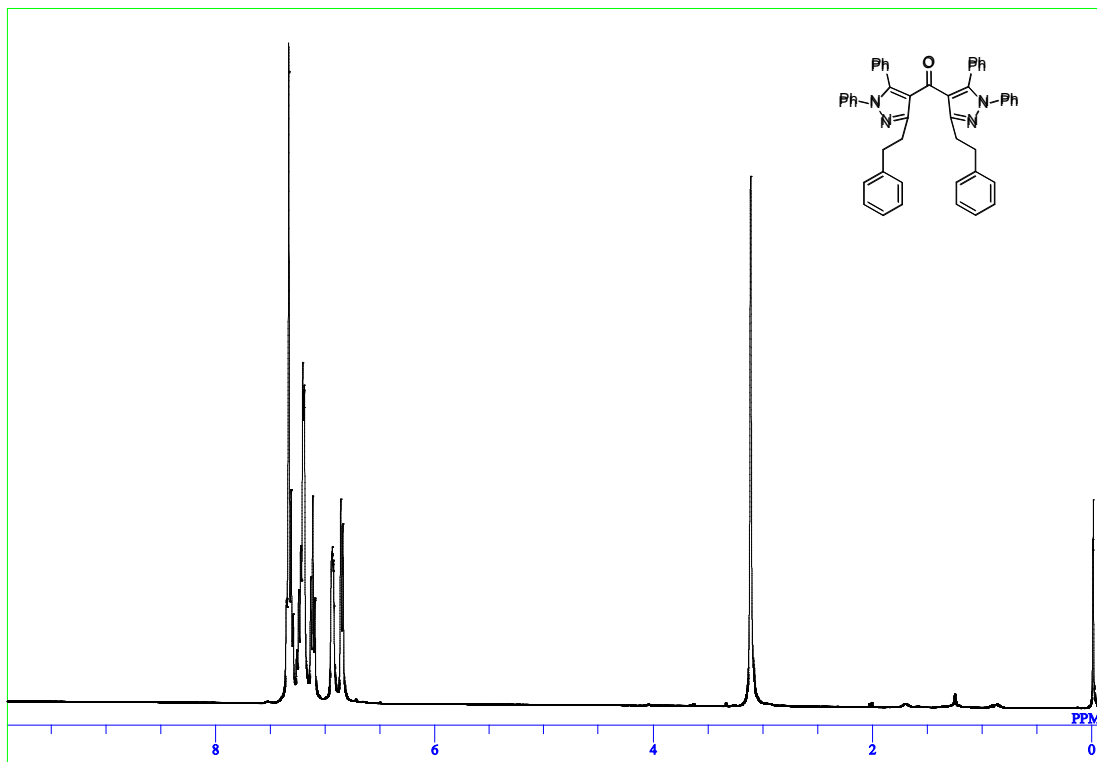

2o

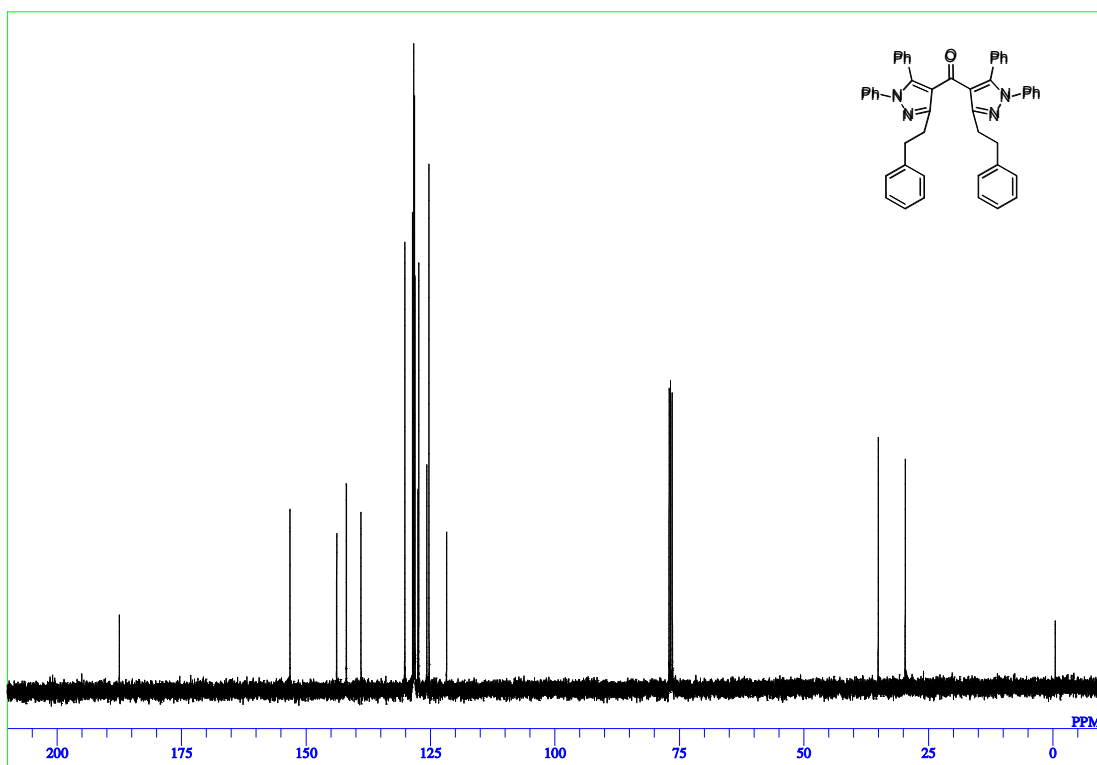

2p

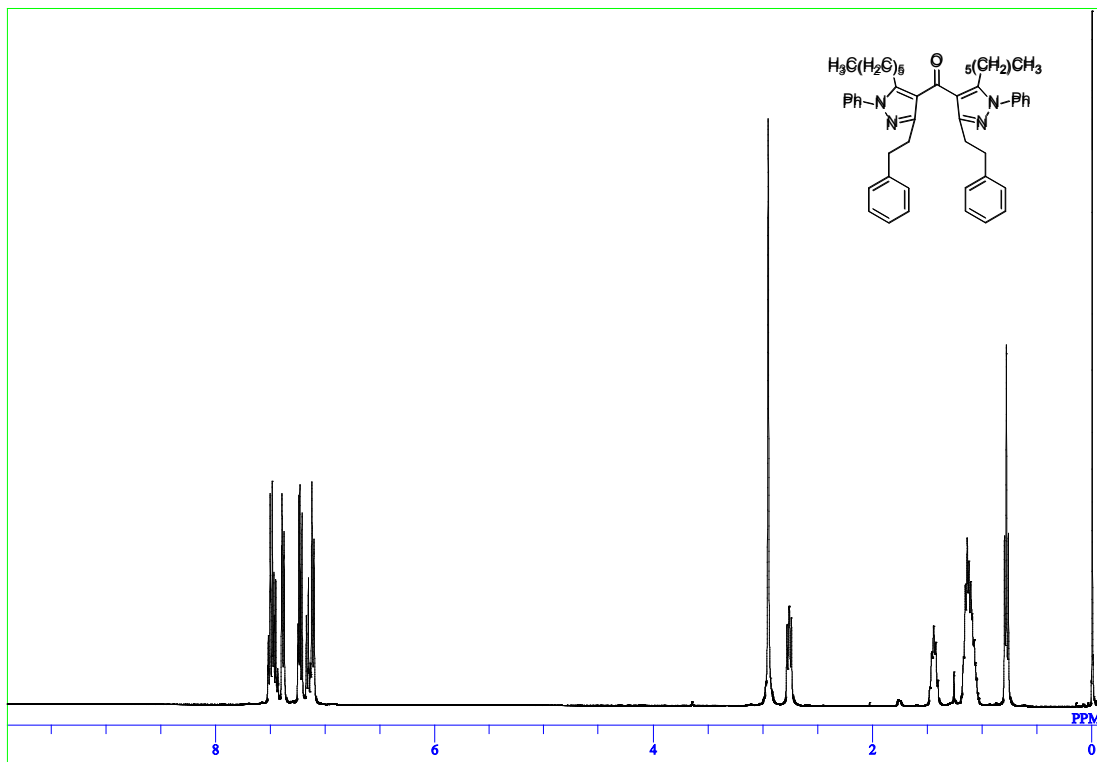

2p

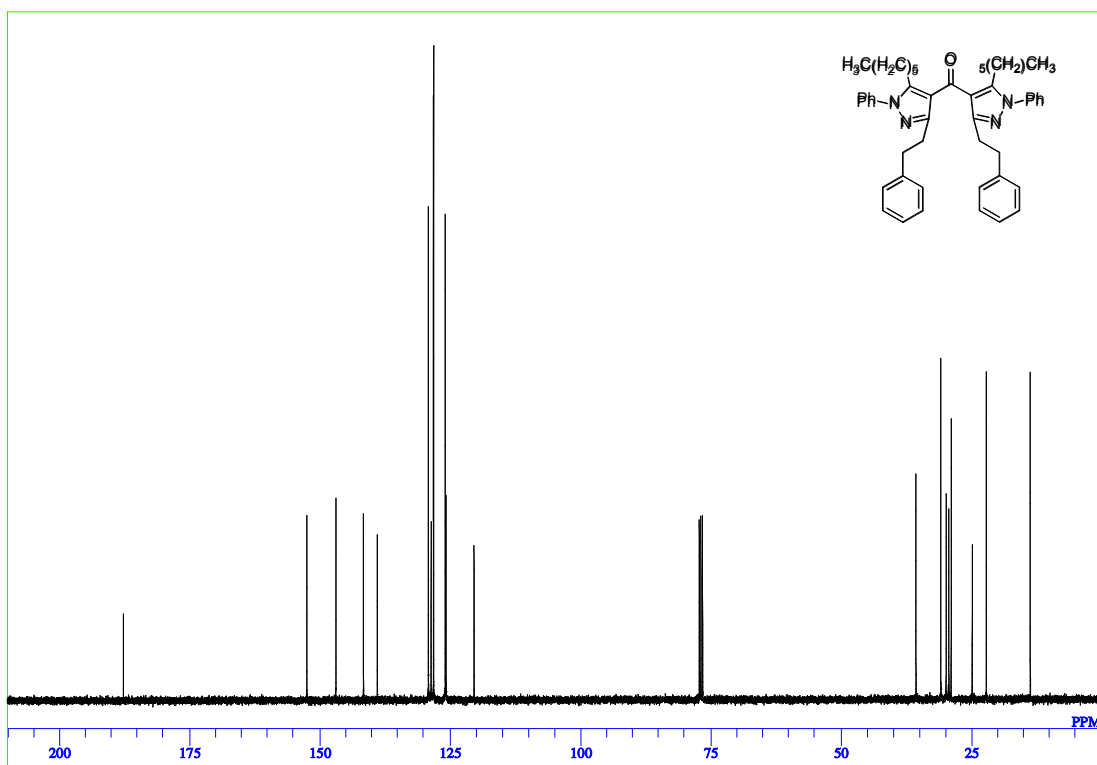

2q

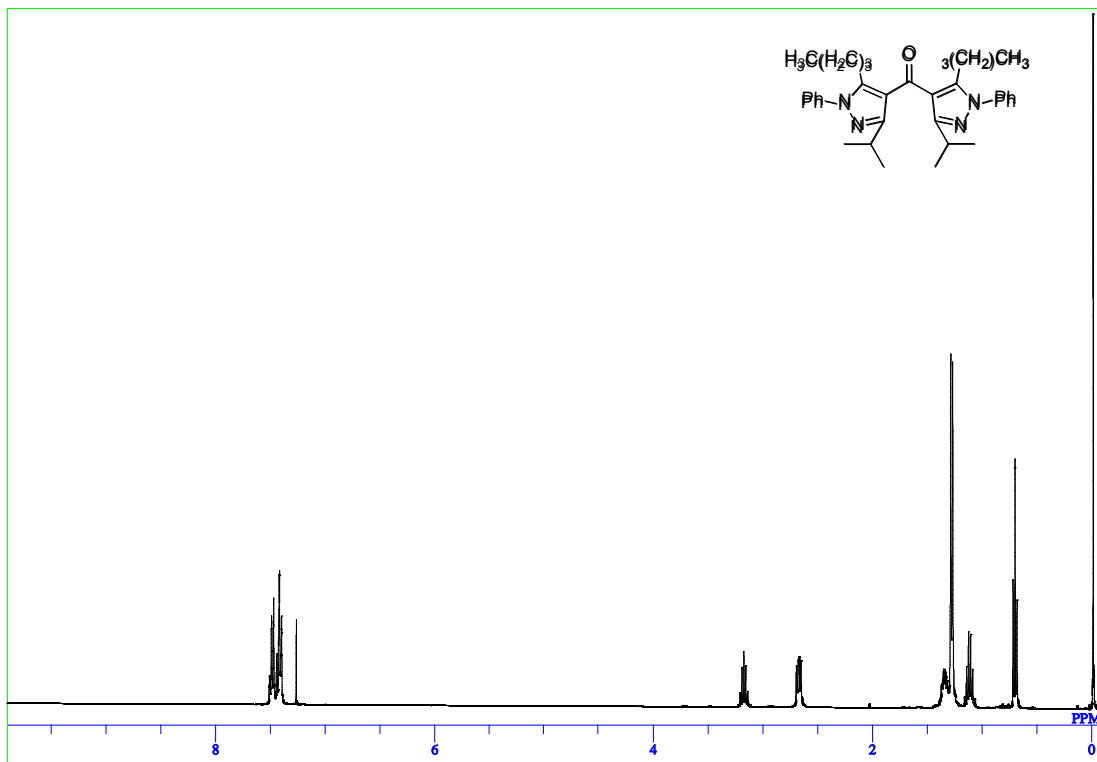

2q

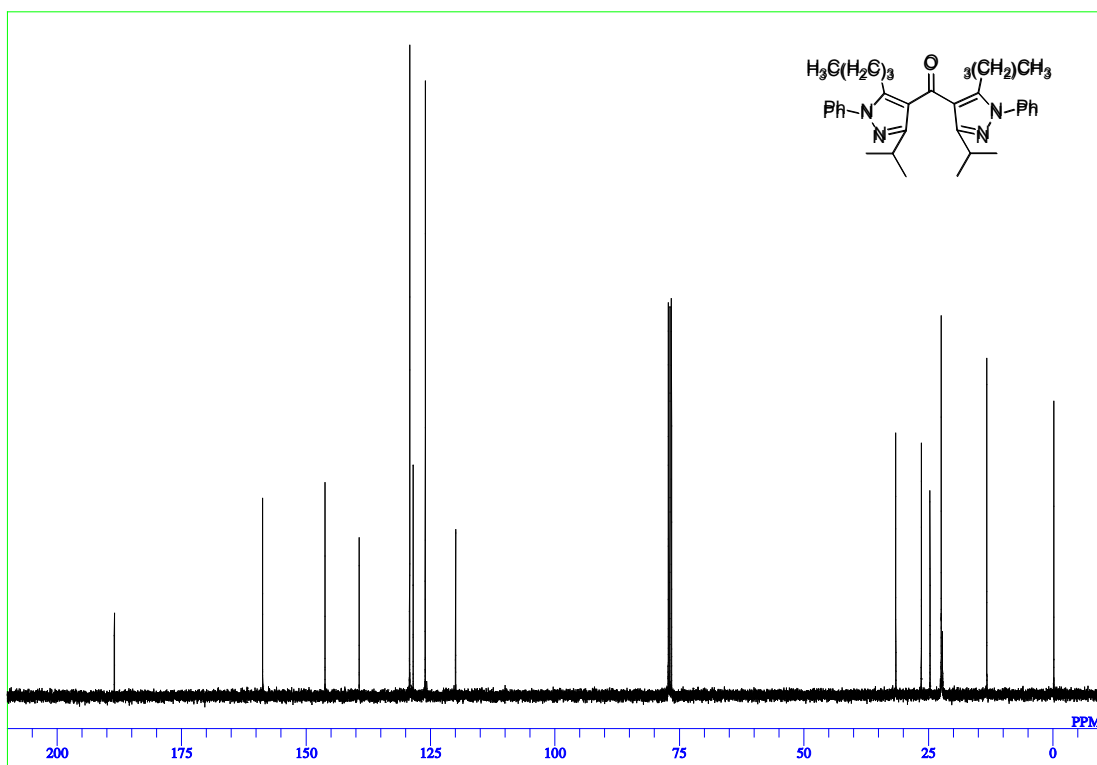



2r

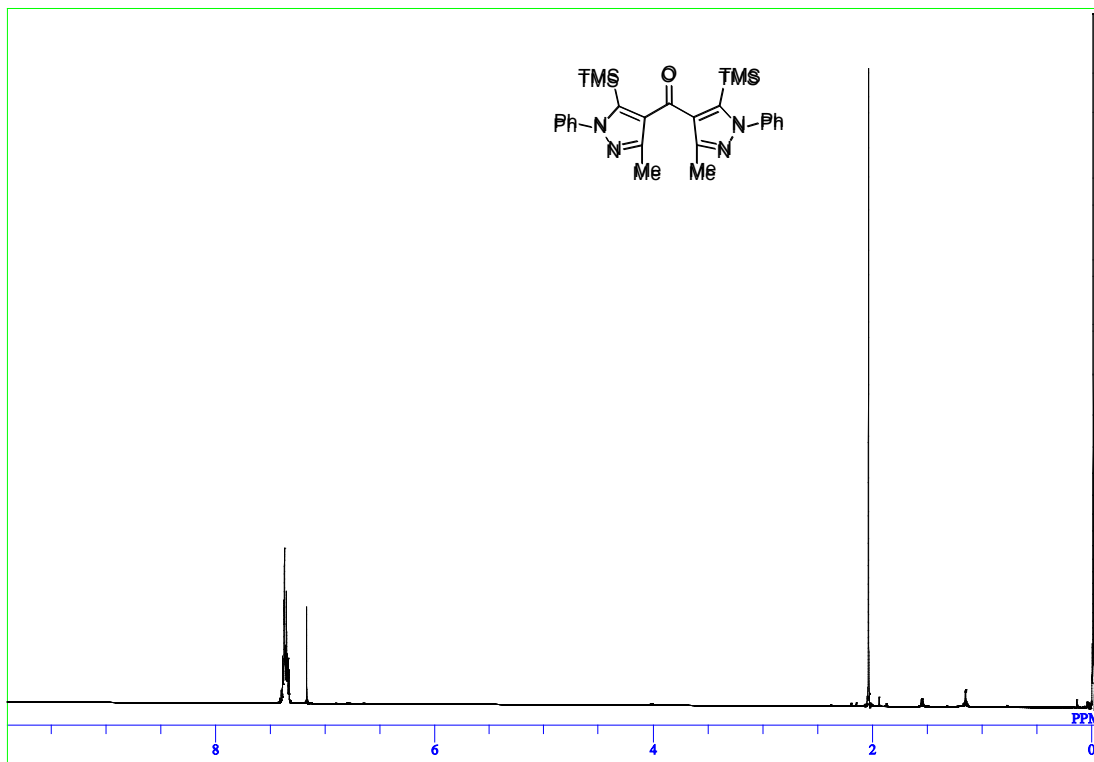

2r

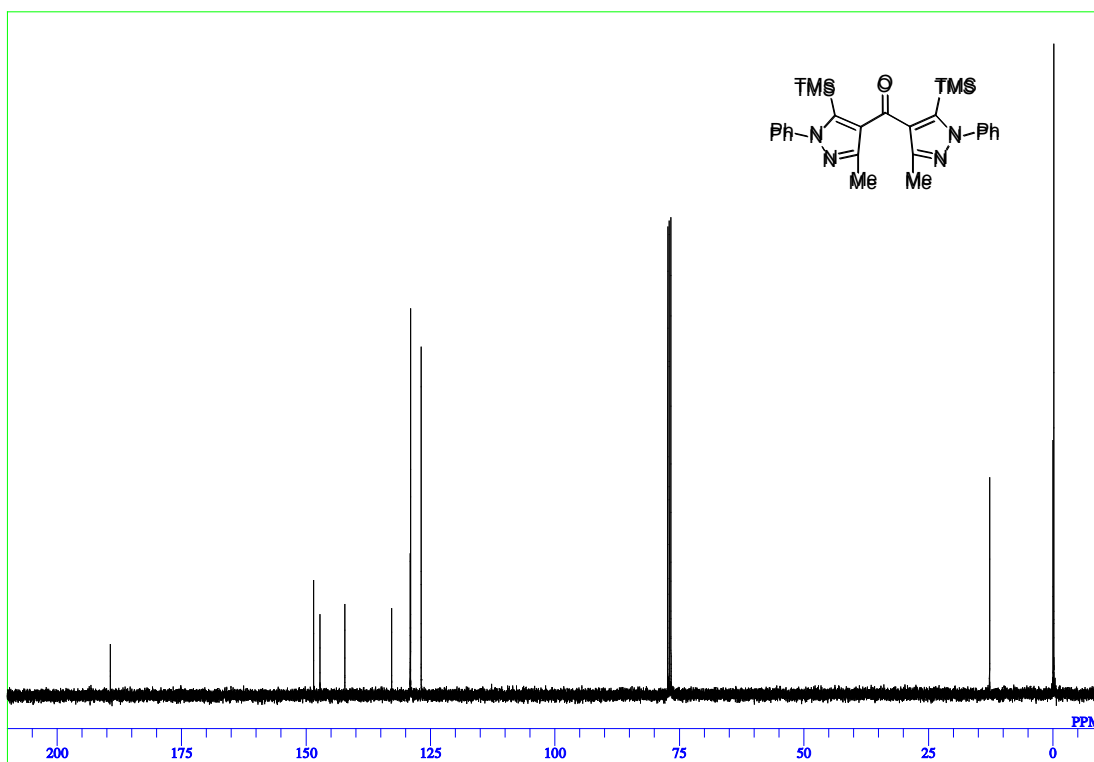

2s

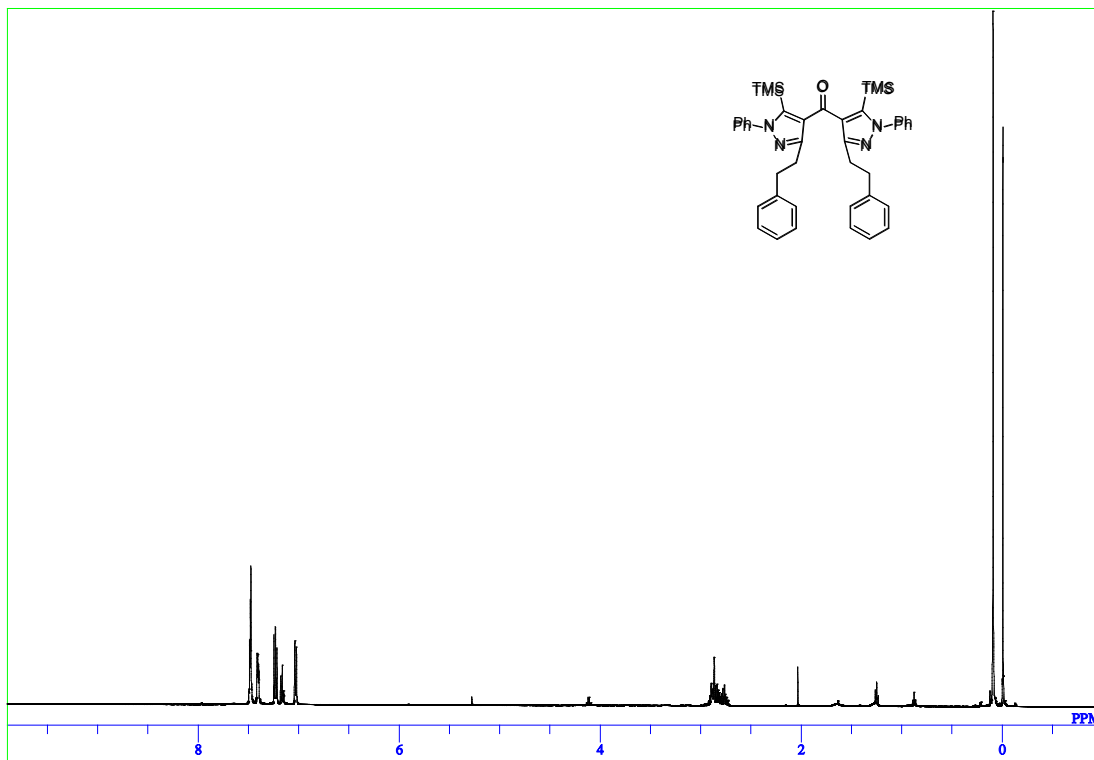

2s

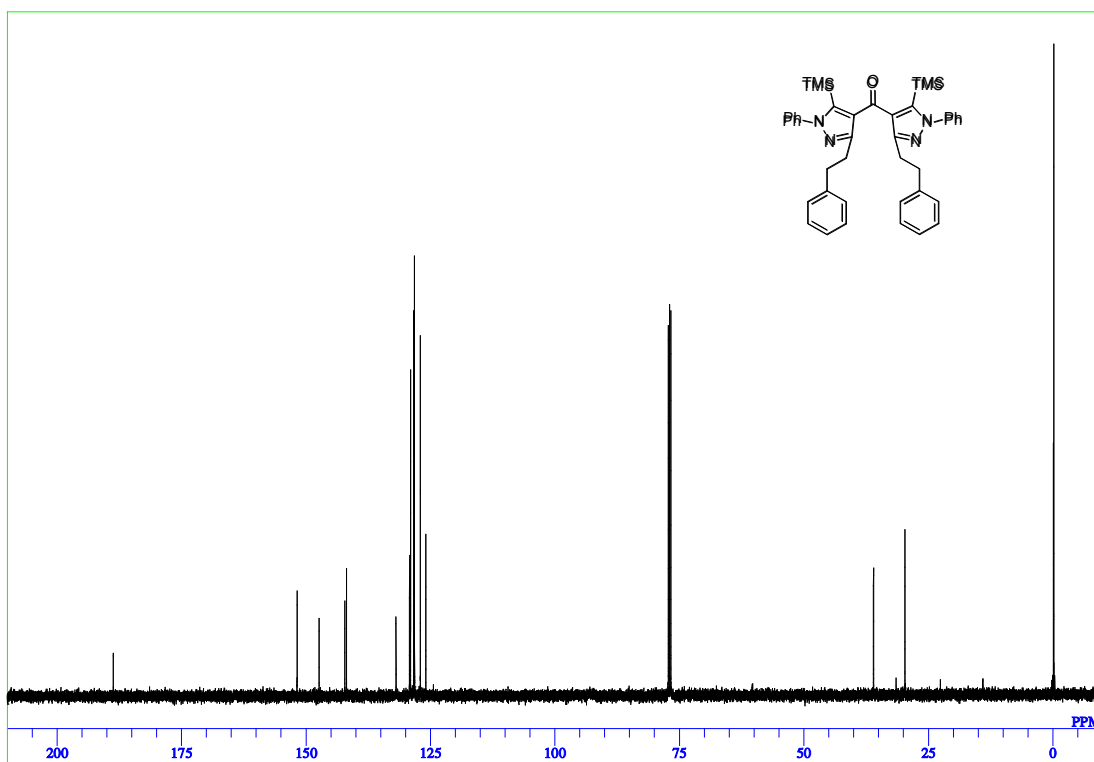

2t

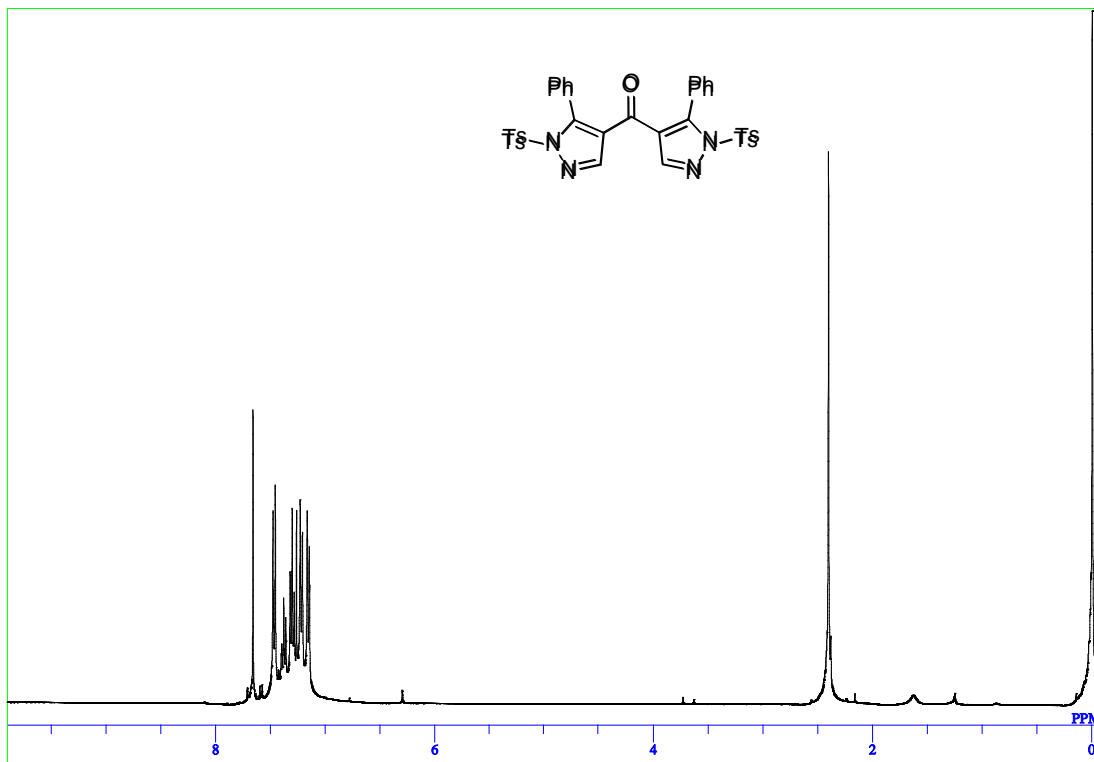

2t

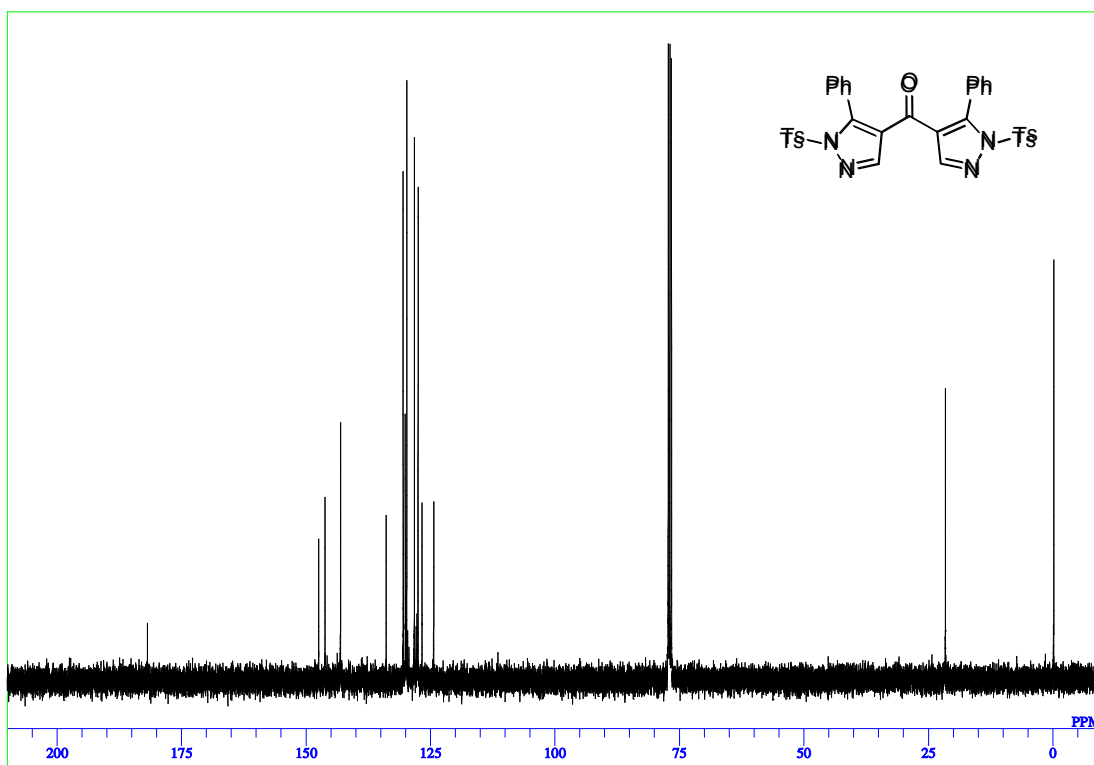

Supplement: c3ob40913a_2.pdf [file c3ob40913a_2.pdf]
